1 **Mechanism and resistance for antimycobacterial activity of a fluoroquinophenoxazine**  
2 **compound**

3  
4 Pamela K. Garcia<sup>1,2</sup>, Thirunavukkarasu Annamalai<sup>1,2</sup>, Wenjie Wang<sup>1,2</sup>, Raven Bell<sup>1</sup>, Duc Le<sup>1</sup>,  
5 Paula Martin Pancorbo<sup>1</sup>, Sabah Sikandar<sup>1</sup>, Ahmed Seddek<sup>1,2</sup>, Xufen Yu<sup>3</sup>, Dianqing Sun<sup>3</sup>, Anne-  
6 Catrin Uhlemann<sup>4</sup>, Purushottam B. Tiwari<sup>5</sup>, Fenfei Leng<sup>1,2</sup>, Yuk-Ching Tse-Dinh<sup>1,2\*</sup>

7  
8 <sup>1</sup> Department of Chemistry & Biochemistry, Florida International University, Miami, Florida,  
9 United States of America

10  
11 <sup>2</sup> Biomolecular Sciences Institute, Florida International University, Miami, Florida, United States  
12 of America

13  
14 <sup>3</sup> Department of Pharmaceutical Sciences, The Daniel K. Inouye College of Pharmacy,  
15 University of Hawaii at Hilo, 34 Rainbow Drive, Hilo, Hawaii, United States of America

16  
17 <sup>4</sup> Division of Infectious Diseases, Columbia University Medical Center, New York, New York,  
18 United States of America

19  
20 <sup>5</sup> Department of Oncology, School of Medicine, Lombardi Comprehensive Cancer Center  
21 Georgetown University Medical Center, Washington DC, United States of America

22  
23 \* Corresponding author, Email: [ytsedinh@fiu.edu](mailto:ytsedinh@fiu.edu) (YT)

## 24 **Abstract**

25           We have previously reported the inhibition of bacterial topoisomerase I activity by a  
26 fluoroquinophenoxazine compound (FP-11g) with a 6-bipiperidinyl lipophilic side chain that  
27 exhibited promising antituberculosis activity (MIC = 2.5  $\mu$ M against *Mycobacterium*  
28 *tuberculosis*, SI = 9.8). Here, we found that the compound is bactericidal towards  
29 *Mycobacterium smegmatis*, resulting in greater than 5 Log<sub>10</sub> reduction in colony-forming units  
30 [cfu]/mL following a 10 h incubation at 1.25  $\mu$ M (4X MIC) concentration. Growth inhibition  
31 (MIC = 50  $\mu$ M) and reduction in cfu could also be observed against a clinical isolate of  
32 *Mycobacterium abscessus*. Stepwise isolation of resistant mutants of *M. smegmatis* was  
33 conducted to explore the mechanism of resistance. Mutations in the resistant isolates were  
34 identified by direct comparison of whole-genome sequencing data from mutant and wild-type  
35 isolates. These include mutations in genes likely to affect the entry and retention of the  
36 compound. FP-11g inhibits *Mtb* topoisomerase I and *Mtb* gyrase with IC<sub>50</sub> of 0.24 and 31.5  $\mu$ M,  
37 respectively. Biophysical analysis showed that FP-11g binds DNA as an intercalator but the IC<sub>50</sub>  
38 for inhibition of *Mtb* topoisomerase I activity is >10 fold lower than the compound  
39 concentrations required for producing negatively supercoiled DNA during ligation of nicked  
40 circular DNA. Thus, the DNA-binding property of FP-11g may contribute to its  
41 antimycobacterial mechanism, but that alone cannot account for the observed inhibition of *Mtb*  
42 topoisomerase I.

43

## 44 **Introduction**

45 Tuberculosis (TB) is a devastating disease caused by *Mycobacterium tuberculosis*  
46 infection. The World Health Organization (WHO) reported that TB is the leading cause of death  
47 worldwide from a single infectious agent. The 2018 Global Tuberculosis Report estimated that  
48 TB caused ~1.6 million deaths in 2017, with up to 10 million newly diagnosed TB cases  
49 annually [1]. Significantly, drug-resistant TB poses a great threat to public health. In 2017, there  
50 were 558,000 new cases of drug resistant TB, including multidrug resistant TB (MDR-TB).  
51 resistant to rifampicin and isoniazid (two first-line anti-TB drugs) and rifampicin-resistant TB  
52 (RR-TB) [1]. These TB patients are more likely to have poor treatment outcomes. Therefore,  
53 there is an urgent need for potent new TB drugs with novel modes of action [2]. Resistance to  
54 current antibiotics also makes it difficult to treat infections caused by nontuberculous  
55 mycobacteria (NTM). It is often difficult to distinguish between *M. tuberculosis* and NTM as  
56 the cause of lung infections, so there is a medical need for new antibiotics that have broad  
57 antimycobacterial activity.

58 DNA topoisomerases are essential enzymes for maintaining optimal DNA topology to  
59 facilitate vital functions including replication, transcription, recombination and DNA repair [3].  
60 Topoisomerases belong to type I or type II families corresponding to cleavage of a single or  
61 double strand of DNA being utilized for catalysis [4] with subfamilies based on sequence  
62 homology and mechanism [5]. Every bacterium has at least one type IA topoisomerase for  
63 overcoming topological barriers that require cutting and rejoining of a single strand of DNA [3,  
64 6]. Topoisomerase I catalytic activity is essential for the viability of *Mycobacterium smegmatis*  
65 (*Msm*) and *M. tuberculosis* (*Mtb*) [7, 8], because these organisms only have one type IA  
66 topoisomerase. *Mtb* topoisomerase I (MtbTopI) is a validated anti-TB target; [7, 9, 10] for  
67 identification of inhibitors that can potentially be developed into leads for new TB therapy.

68 We have previously shown [11] that a fluoroquinophenoxazine compound (FP-11g,  
69 shown in Scheme 1) with a 6-bipiperidinyl lipophilic side chain inhibited the catalytic activity of  
70 *Escherichia coli* topoisomerase I ( $IC_{50} = 0.48 \mu M$ ), and showed promising antituberculosis  
71 activity (MIC = 2.5  $\mu M$  against *Mtb* H37Rv, SI = 9.8 for Vero cell cytotoxicity). In this study,  
72 we followed up on the antimycobacterial activity of this compound to further explore its  
73 therapeutic potential. The interactions of this compound with MtbTopI and DNA were  
74 characterized in biophysical assays. Mechanism of resistance to its antimycobacterial activity  
75 was studied with *M. smegmatis*. This commonly used model mycobacterial organism is non-  
76 pathogenic and fast growing, but still shares many features with pathogenic mycobacteria.  
77

## 78 **Materials and Methods**

### 79 **Synthesis of FP-11g**

80 FP-11g (Scheme 1) was synthesized using our previously reported procedure [11]. The structure  
81 was confirmed by  $^1H$  NMR, and high-resolution mass spectrometry (HRMS). Purity was  
82 determined to be >99% by reverse phase C18-HPLC.

83

### 84 **MIC (minimum inhibitory concentration) against *M. smegmatis* and *M. abscessus***

85 *M. smegmatis* mc2 155 (WT from ATCC) and FP-11g resistant mutants derived from WT were  
86 cultured in 5 ml Middlebrook 7H9 broth containing 0.2% glycerol, 0.05% Tween 80 with or  
87 without a supplement of 10% albumin, dextrose, sodium chloride (ADN) at 37°C with shaking.  
88 Stationary phase bacteria cultures were adjusted to an optical density ( $OD_{600}$ ) of 0.1 and  
89 subsequently diluted 1:10 using growth media. Fifty microliters ( $\sim 10^5$  cfu) of the diluted culture  
90 were transferred to the individual wells of a clear round-bottom 96-well plate containing 50  $\mu l$  of

91 serially diluted compounds. The 96-well plate was then incubated at 37°C with shaking. After 48  
92 hours of incubation, resazurin (final concentration 0.002%) was added to the individual wells  
93 and the fluorescence reading at 560/590 nm was taken with a BioTek Synergy plate reader after  
94 approximately 5h of incubation at 37°C.

95         A clinical isolate of *M. abscessus* bacterium (isolated at the Columbia University Medical  
96 Center) was cultured in Middlebrook 7H9 ADN broth till it reached an optical density (OD<sub>600</sub>) of  
97 1.0. The culture was stored at -80°C as 1 ml aliquots containing 15% glycerol. These frozen  
98 aliquots were then used as the inoculum for *M. abscessus* MIC assays. Prior to conducting each  
99 MIC assay, an aliquot of frozen *M. abscessus* was thawed and diluted 1:100 in Middlebrook 7H9  
100 broth. After dilution, the bacterial cells (~10<sup>5</sup> cfu) were added to the wells of a 96-well plate  
101 containing the serially diluted compounds as described for *M. smegmatis* cells and incubated at  
102 37°C with no shaking for 48 h. Subsequently, resazurin (final concentration 0.005%) was added  
103 to each well and fluorescence reading at 560/590 nm (excitation/emission) was taken after 24 h  
104 of incubation at 37°C. MIC was determined as compound concentration that showed at least 90%  
105 reduction in fluorescence when compared to the control (no inhibitor) wells. Ciprofloxacin and  
106 Clarithromycin were included in the assay as positive controls. On the day of each MIC assay,  
107 thawed inoculum of *M. abscessus* was also serially diluted and spread plated on LB agar plates  
108 to confirm for the inoculum load of ~10<sup>5</sup> cfu/well. MIC determination for each bacteria was  
109 repeated at least three times.

110

### 111 **Survival assays**

112 The bactericidal effect of FP-11g compound was evaluated in 96-well plates using a protocol  
113 similar to the MIC assay. In brief, *M. smegmatis* was incubated at 37°C with shaking in the

114 presence of 1X, 2X, 4X and 8X MIC of FP-11g for 6, 10, 24 and 48 hours; *M. abscessus* was  
115 incubated at 37°C without shaking in the presence of 1X and 2X MIC of FP-11g for 24, 48 and  
116 72 hours. At each time point 20 µl from the treatment wells were serially diluted (10 fold),  
117 spread on LB agar plates and incubated at 37°C for 4 or 7 days for counting the viable colonies  
118 of *M. smegmatis* and *M. abscessus* respectively. Ten microliters from the treatment wells were  
119 also enriched in 5-ml of Middlebrook 7H9 broth if there are no viable colonies from a particular  
120 treatment-time combination on the LB agar plates. The survival percentage was calculated by  
121 dividing the number of viable colonies at each time point by the initial viable count prior to the  
122 treatment (time 0). Survival assays were repeated three times.

123

#### 124 **Isolation of resistant mutants**

125 *M. smegmatis* mc2 155 was exposed stepwise to increasing concentrations of FP-11g to isolate  
126 mutant strains with different levels of resistance for FP-11g by a slightly modified protocol as  
127 described by Fujimoto-Nakamura et al [12]. Overnight culture of *M. smegmatis* was adjusted  
128 to an optical density (OD<sub>600</sub>) of 0.1 and a volume of 100 µl (2x10<sup>6</sup> cfu) was spread on 7H9 ADN  
129 agar containing 2.5 µM (8X MIC) FP-11g for isolation of resistant mutants. Colonies appearing  
130 on these plates were scored as resistant mutants only if they grew again on 7H9 ADN broth and  
131 agar plates containing 8X MIC of FP-11g. Mutation frequency was calculated based on these  
132 resistant colonies. Only one resistant mutant was isolated at 8X MIC of FP-11g. This resistant  
133 mutant was next exposed to 16X MIC of FP-11g in 7H9 ADN broth to further isolate resistant  
134 colonies PGM1, PGM2 shown in Table 1. As our initial resistant mutation isolation at 8X MIC  
135 of FP-11g resulted in only one mutant, a second round of stepwise mutation was initiated with  
136 4X MIC to higher concentrations of FP-11g (PGM3 – PGM6 shown in Table 1).

137

## 138 **Whole genome sequencing**

139 *M. smegmatis* WT and mutant strains were cultured in 5 ml of Middlebrook 7H9 ADN broth and  
140 2 ml was spun down for genomic DNA extraction. DNA extraction was performed using the  
141 BACTOZOL™ Bacterial DNA isolation kit (Molecular Research Center) according to  
142 manufacturer's instructions. DNA quality was evaluated through the UV absorbance 260/280  
143 ratio (>1.8) and DNA quantity was measured using a fluorescence-based Qubit® dsDNA BR  
144 (Broad-Range) Assay Kit (Thermo Fisher). DNA concentration was adjusted to 0.2 ng/μl with  
145 10 mM Tris-HCl pH 8.0. After concentration adjustment, all the genomic DNA samples were  
146 quantified once again to confirm the concentration. Library was prepared with the Nextera XT  
147 DNA Library Prep Kit, 96 Indexes (FC-131-1096). After clean-up of the libraries, random  
148 samples were selected for the Bio-analyzer analysis to verify the average size of the fragments.  
149 Cleaned up libraries were normalized manually and pooled together. The pooled libraries were  
150 then denatured with NaOH (final concentration 0.1 N) and the PhiX Control v3 library added.  
151 This mix was loaded in the pre-thawed reagent cartridge associated with the MiSeq Reagent kit  
152 v3 and sequenced using Illumina MiSeq® Next Generation Sequencer. FASTQ files generated  
153 from the sequencing run was further analyzed in CLC genomics workbench 10 software  
154 (QIAGEN). Sequence of *M. smegmatis* mc2 155 WT strain from our laboratory was used as  
155 reference to compare all the mutant sequences and detect variations (Single Nucleotide  
156 Variations, Deletions and Insertions).

157

## 158 **Enzyme assays**

159 *MtbTopI relaxation inhibition assay* - MtbTopI was expressed in *E. coli* T7 Express crystal strain  
160 (New England Biolabs) and purified as previously described [13,14]. The relaxation activity of  
161 MtbTopI was assayed in a buffer containing 10 mM Tris-HCl, pH 8.0, 50 mM NaCl, 0.1 mg/ml  
162 gelatin, and 0.5 mM MgCl<sub>2</sub>. Serial dilutions of FP-11g dissolved in DMSO was mixed with 10 µl  
163 of the reaction buffer containing 12.5 ng of enzyme before the addition of 9 µl of reaction buffer  
164 containing 160 ng of supercoiled pBAD/Thio plasmid DNA purified by cesium chloride gradient  
165 as the substrate. The reactions were terminated following an incubation of the mixtures at 37°C  
166 for 30 min by the addition of 4 µl of stop solution (50% glycerol, 50 mM EDTA, and 0.5%  
167 (vol/vol) bromophenol blue) and the mixtures were analyzed by agarose gel electrophoresis with  
168 TAE buffer (40 mM Tris acetate and 1 mM EDTA, pH 8.2). The gels were stained in ethidium  
169 bromide and photographed under UV light.

170  
171 *DNA gyrase supercoiling inhibition assay* – Mtb DNA gyrase was purchased from Inspiralis. The  
172 supercoiling assays were carried out by mixing serial dilutions of FP-11g in 0.5 µl DMSO with 1  
173 U of the enzyme in reaction buffer of 50 mM HEPES pH 7.9, 100 mM potassium glutamate, 6  
174 mM magnesium acetate, 4 mM DTT, 1 mM ATP, 2 mM spermidine, 0.05 mg/ml BSA, followed  
175 by the addition of 300 ng of relaxed covalently closed circular DNA, for a final reaction mixture  
176 volume of 20 µl. The samples were incubated at 37°C for 30 min before the reactions were  
177 terminated and analyzed by agarose gel electrophoresis.

178

### 179 **Surface Plasmon Resonance**

180 Biacore T200 SPR instrument was used to conduct all experiments. MtbTopI was used as ligand  
181 to immobilize on a CM5 sensor surface in 10 mM sodium acetate buffer at pH 5.5, using



182 standard amine coupling chemistry, to a level of ~13400 RU. PBS-P (20 mM phosphate buffer,  
183 pH 7.4, 2.7 mM KCl, 137 mM NaCl, 0.05% v/v surfactant P20) was used as the immobilization  
184 running buffer. FP-11g was used as an analyte to inject over the ligand immobilized surface in  
185 various concentrations in the presence of PBS-P buffer supplemented with 10% DMSO. The  
186 flow rate of all analyte solutions was maintained at 50  $\mu$ l/min. One 20 s pulse of 1M NaCl  
187 solution was injected for surface regeneration. The contact and dissociation times used were 60s  
188 and 300s, respectively. SPR sensorgrams were both reference and bulk subtracted. All  
189 experiments were conducted at 25°C.

190

#### 191 **Measurement of visible absorbance and fluorescence emission spectra**

192 Visible absorbance spectra of free and bound FP-11g were recorded in a Cary Bio50 UV-VIS  
193 spectrophotometer. Fluorescence emission spectra were measured by using a Cary fluorescence  
194 spectrophotometer.

195

#### 196 **DNA UV Melting studies**

197 DNA UV melting curves were determined using a Cary 100 UV-Vis spectrophotometer  
198 equipped with a thermoelectric temperature-controller. The salmon testes (ST) DNA in the  
199 presence of different concentrations of FP-11g in 1 $\times$ BPE buffer (6 mM Na<sub>2</sub>HPO<sub>4</sub>, 2 mM  
200 NaH<sub>2</sub>PO<sub>4</sub>, and 1 mM EDTA, pH 7) was used for UV melting studies. Samples were heated at a  
201 rate of 1°C min<sup>-1</sup>, while continuously monitoring the absorbance at 260 nm. Primary data were  
202 transferred to the graphic program Origin (MicroCal, Inc., Northampton, MA) for plotting and  
203 analysis.

204

## 205 **Dialysis experiments**

206 Dialysis assays were carried out according to the previously published procedure [15]. Briefly, a  
207 volume of 0.3 ml of 75  $\mu$ M (bp) of ST DNA was pipetted into a 0.3 ml disposable dialyzer. The  
208 dialysis units were then placed into a beaker with 100 ml of 1 $\times$ BPE buffer (6 mM Na<sub>2</sub>HPO<sub>4</sub>, 2  
209 mM NaH<sub>2</sub>PO<sub>4</sub>, and 1 mM EDTA, pH 7) containing 1  $\mu$ M of FP-11g. The dialysis was allowed to  
210 equilibrate with continuous stirring for 72 hours at room temperature (24°C). After the dialysis,  
211 the free, bound, and total concentrations of FP-11g were determined spectrophotometrically.  
212 These values were used to determine the DNA binding constant of FP-11g.

213

## 214 **DNA ligation assays**

215 DNA ligation assays were carried out in 1 $\times$ DNA T4 DNA ligase buffer (50 mM Tris-HCl (pH  
216 7.5), 10 mM MgCl<sub>2</sub>, 1 mM ATP, and 10 mM DTT) using 1,200 units of T4 DNA ligase (New  
217 England Biolabs) in 100  $\mu$ l of solution containing the nicked plasmid pAB1 [16] in the presence  
218 of different concentrations of FP-11g. After incubation at 37°C for 30 min, the ligation reactions  
219 were stopped by extraction with 100  $\mu$ l of phenol. The DNA samples were analyzed by  
220 electrophoresis in a 1% agarose gel in TAE. After electrophoresis, the agarose gel was stained  
221 with ethidium bromide and photographed using a Kodak imaging system.

222

## 223 **Results**

### 224 **Growth inhibition of *M. smegmatis* and *M. abscessus***

225 The MIC of FP-11g for *M. smegmatis* mc2 155 was found to be 0.31  $\mu$ M in multiple  
226 measurements. The MIC value is the same in 7H9 media with or without ADN supplement.  
227 There is also no effect on the MIC from shaking during the incubation. For the clinical *M.*

228 *abscessus* isolate, the MIC was 50  $\mu$ M, compared to Clarithromycin MIC of 0.7-1.56  $\mu$ g/ml (1-2  
229  $\mu$ M) and Ciprofloxacin MIC of 12.5  $\mu$ g /ml (38  $\mu$ M), IC<sub>50</sub> for 50% growth inhibition of the *M.*  
230 *abscessus* strain was estimated to be 3-6  $\mu$ M.

231

### 232 **Bactericidal activity of FP-11g**

233 FP-11g showed strong bactericidal activity against *M. smegmatis*. When *M. smegmatis* cells  
234 ( $\sim 1 \times 10^5$  cells in each well in 96-well plate) were exposed to 2X MIC of FP-11g, the cell viability  
235 was diminished by  $\sim 4.5$  Log after 48 hours of incubation (Fig 1A). For concentrations of 4X  
236 MIC and 8X MIC, 24 hours were sufficient to diminish cell viability by greater than 5 Log, with  
237 no viable cells remaining at 48 hours.

238 Treatment of *M. abscessus* with 2X MIC of FP-11g resulted in  $>3$  Log loss of cell  
239 viability (Fig 1B). The *M. abscessus* strain grows slower than *M. smegmatis*, so treatment was  
240 extended to 72 hours. Because of the higher MIC value for *M. abscessus*, FP-11g concentrations  
241 could only be tested at up to 4X MIC in the survival assay.

242

### 243 **Fig 1. Bactericidal effect of FP-11g on *M. smegmatis* mc2 155 and *M. abscessus***

244 **(A)** The bactericidal effect of FP-11g on *M. smegmatis* were determined using 1X (0.31  $\mu$ M), 2X  
245 (0.62  $\mu$ M), 4X (1.25  $\mu$ M) and 8X (2.5  $\mu$ M) MIC at different time points. The downward arrow  
246 indicates that no viable colonies were detected following treatment with 4X and 8X MIC at time  
247 points beyond 10 hours. **(B)** Survival of clinical isolate of *M. abscessus* following treatment  
248 with FP-11g at 50 and 100  $\mu$ M. Percent survival is calculated by the ratio of cfu from treated  
249 culture versus cfu from culture prior to addition of FP-11g. The error bars represent the standard  
250 deviation of results of experiments repeated three times.

251

## 252 **Isolation and verification of resistant mutants**

253 The mutation frequency for resistance to FP-11g at 8X (MIC) was estimated to be  $5 \times 10^{-7}$ . Six  
254 *M. smegmatis* strains (PGM1 – PGM6, Table 1) isolated from stepwise increase of FP-11g  
255 concentrations were verified to be resistant to the compound by determination of MIC. An  
256 increase in the resistance to Moxifloxacin was also observed but the fold-increase in  
257 Moxifloxacin was significantly lower than the fold-increase for FP-11g MIC.

258

## 259 **Mutations identified in WGS**

260 The mutations found in each of the resistant strains are listed in Table 2. Mutations in ten  
261 different genes associated with deletions, insertions or SNV (Single Nucleotide Variations) were  
262 detected in these mutants (Table S1). All of the resistant strains have SNV on *MSMEG\_0965*  
263 gene (*mspA*), which codes for the major porin in *M. smegmatis*. This porin is important for the  
264 permeation of nutrients and antibiotics inside the cell. Previous studies showed that the deletion  
265 of this gene in *M. smegmatis* resulted in a reduced permeability to drugs such as  $\beta$ -lactams,  
266 fluoroquinolones and chloramphenicol [17-20]. The *mspA* gene is present in fast-growing  
267 mycobacteria only, and is not found in *M. tuberculosis* [21, 22].

268 The second most frequent mutation (in 3 out of 6 mutants) detected corresponds to  
269 *MSMEG\_5623* and *MSMEG\_6430*. *MSMEG\_5623* gene codes for an L-carnitine dehydratase  
270 homolog of unknown function in *M. smegmatis*, with no homolog in *M. tuberculosis* according  
271 to Tuberculist (<http://svitsrv8.epfl.ch/tuberculist/>). However, using the blast tool it was  
272 determined that this L-carnitine dehydratase homolog from *M. smegmatis* has 32% identity when  
273 aligned with the L-carnitine dehydratase from *M. tuberculosis* (*Rv3272*), including Asp33

274 (conserved amino acid) that corresponds to the amino acid mutated in FP-11g resistant strains.  
275 *MSMEG\_6430*, with a Thr to Lys substitution mutation detected in two mutants, is classified as a  
276 membrane protein that may have diverse functions in the cells, such as transportation of  
277 molecules through the membrane or serving as receptors for chemical signals [23, 24]. An Ile to  
278 Ser substitution mutation was also detected in *MSMEG\_2820* which encodes for an unknown  
279 integral membrane protein. The mutations in diverse membrane proteins detected here may  
280 affect the transport of FP-11g across the membrane.

281 The remainder of detected mutations occurred at lower frequencies. *MSMEG\_1513* (Ser  
282 to Cys substitution) codes for a hypothetical protein with no homolog in *M. tuberculosis* and has  
283 been classified as an oxidoreductase. *MSMEG\_0241* (homolog of *Rv0202c*) with frame shift  
284 mutation detected encodes for MmpL11 (mycobacteria membrane protein large), a protein that  
285 belongs to a family of transporters and contribute to the cell wall biosynthesis in mycobacteria  
286 [25]. MmpL proteins family has been associated with drug resistance in *M. abscessus* and *M.*  
287 *tuberculosis* [26]. Frame shift mutation was also detected in *MSMEG\_0240* (homolog of  
288 *Rv0201c*), which does not have a known function.

289

### 290 **Comparison of inhibition of MtbTopI versus DNA gyrase**

291 The IC<sub>50</sub> of FP-11g for inhibition of *E. coli* topoisomerase I relaxation activity has been reported  
292 as 0.48 μM [11]. In comparison, the IC<sub>50</sub>s for inhibition of human topoisomerase I relaxation  
293 activity and topoisomerase IIα decatenation activity were found to be both around 3.9 μM in the  
294 previous report [11]. Here we determined the IC<sub>50</sub> for inhibition of MtbTopI and *Mtb* DNA  
295 gyrase by FP-11g (Fig 2). The IC<sub>50</sub> for MtbTopI (0.24 μM) is ~100-fold lower than the IC<sub>50</sub> for  
296 inhibition of *Mtb* DNA gyrase (31 μM).

297

298 **Fig 2. Comparison of inhibition of MtbTopI and DNA gyrase activities by FP-11g**

299 (A) Inhibition of MtbTopI relaxation of negatively supercoiled DNA by increasing concentrations  
300 of FP-11g. (B) Inhibition of *Mtb* DNA gyrase supercoiling of relaxed DNA requires higher  
301 concentrations of FP-11g.

302

303 **FP-11g can interact directly with MtbTopI**

304 To detect direct enzyme-inhibitor interaction, MtbTopI was immobilized on the CM5 chip  
305 surface and allowed to interact with FP-11g in the analyte solution. The SPR sensorgram (Fig 3)  
306 qualitatively showed that MtbTopI interacts directly with FP-11g.

307

308 **Fig 3. Qualitative evaluation of the binding of FP-11g with MtbTopI using SPR**

309 SPR sensorgrams showing the direct binding of FP-11g with the immobilized MtbTopI. FP-11g  
310 was injected at 2.5  $\mu$ M (green), 5  $\mu$ M (blue), and 10  $\mu$ M (red) in duplicate.

311

312 **FP-11g binds to DNA with intercalation**

313 Since FP-11g has a planar tetracyclic ring scaffold (Scheme 1), it may bind to DNA by  
314 intercalation. Fig 4 shows the visible absorption spectra (Fig 4A) and fluorescence emission (Fig  
315 4B) spectra of free and DNA-bound FP-11g. Binding of the compound to DNA results in a red  
316 shift of the maximum absorbance from 386 nm to 406 nm. Interestingly, upon binding to DNA,  
317 FP-11g has a pronounced induced visible band around 330 nm with a maximum absorbance at  
318 334 nm. Binding of FP-11g to DNA also causes a red shift to the fluorescence emission spectrum

319 of FP-11g (Fig 4B). The fluorescence intensity is slightly enhanced upon binding to DNA. Table  
320 3 summarizes the optical properties of free and DNA-bound FP-11g.

321 Fig 4C shows the DNA UV melting profiles in which different concentrations of FP-11g  
322 were added to the same concentration of ST DNA. In the absence of FP-11g, the UV melting  
323 temperature of ST DNA ( $T_m$ ) was determined to be 70.8°C. In the presence of saturated FP-11g  
324 (40  $\mu$ M), the DNA UV melting temperature was increased to 81.9°C, indicating that FP-11g  
325 tightly binds to ST DNA. In this study, we also carried out a dialysis binding assay in which 75  
326  $\mu$ M (bp) ST DNA was extensively dialyzed against a large excess of 1  $\mu$ M of FP-11g. Fig 4D  
327 shows our results. After 72 hours of dialysis, the concentration of FP-11g outside the dialysis bag  
328 was not significantly changed. In contrast, the concentration of FP-11g inside the dialysis bag  
329 where the ST DNA was located was increased to 25  $\mu$ M. The DNA binding constant of FP-11g  
330 was estimated to be  $1 \times 10^6 \text{ M}^{-1}$  in 1XBPE.

331  
332 **Fig 4. Binding of FP-11g to salmon testes DNA in 1×BPE buffer (6 mM Na<sub>2</sub>HPO<sub>4</sub>, 2 mM**  
333 **NaH<sub>2</sub>PO<sub>4</sub>, and 1 mM EDTA, pH 7). (A) Visible absorption spectra of free (black line) and DNA**  
334 **bound (red line). (B) Fluorescence emission spectra of free (black line) and DNA bound (red line).**  
335 **The fluorescence emission spectra were recorded with  $\lambda_{em} = \text{nm}$ . (C) DNA UV melting of salmon**  
336 **testes DNA in the presence of various concentrations of FP-11g. The FP-11g concentrations are 0,**  
337 **2, 5, 7.5, 10, 15, 20, and 40  $\mu$ M from left to right. (D) The DNA dialysis assay was performed as**  
338 **described in the Methods. Visible absorption spectra of FP-11g inside the dialysis bag (red line)**  
339 **and outside dialysis bag (black line).**

340

341 Fig 5 shows the results of ligation of nicked circular DNA in the presence of different  
342 concentrations of FP-11g by T4 DNA ligase. Change in DNA linking number was observed at 2  
343  $\mu\text{M}$ . Concentrations of FP-11g at 5 and 10  $\mu\text{M}$  drove the plasmid DNA template into (-)  
344 supercoiled DNA. This result suggests that FP-11g can act as a DNA intercalator at these higher  
345 concentrations. The DNA intercalation of FP-11g at the observed  $\text{IC}_{50\text{s}}$  could be the basis for the  
346 inhibition of DNA gyrase and human topoisomerases [11], but could not be the sole basis of  
347 inhibition of bacterial topoisomerase I observed at 10-fold lower  $\text{IC}_{50\text{s}}$ .

348

349 **Fig 5. Products of DNA ligation in the presence of FP-11g.** DNA ligation of nicked pAB1  
350 plasmid DNA by T4 DNA ligase in the presence of indicated concentrations of FP-11g were  
351 performed as described under Methods.

352

## 353 Discussion

354 In previous studies, the FP-11g compound has been proposed as an antimycobacterial agent  
355 active against *M. tuberculosis* (MIC = 2.5  $\mu\text{M}$ ) [11]. Here we demonstrate its activity against the  
356 pathogenic NTM *M. abscessus*. Compounds active against both species would be useful in  
357 clinical settings since in some cases the symptoms and clinical manifestations of infections  
358 caused by these two organisms are difficult to differentiate, consequently empiric treatment  
359 effective for both organisms is required. Additionally, patients suffering from cystic fibrosis or  
360 other immunosuppressive condition can be infected by different mycobacteria at the same time.  
361 In fact, co-infections with *M. abscessus* and *M. tuberculosis* have been reported [27, 28]. The  
362 strong bactericidal effect of FP-11g against *M. smegmatis* supports investigation of this  
363 compound and its derivatives for its potential use as a broad antimycobacterial agent. The



364 finding of the growth inhibitory effect of FP-11g on *M. abscessus* is encouraging because of the  
365 lack of response of NTM clinical strains and subspecies of *M. abscessus* to nearly all of the  
366 current antibiotics.

367 No specific mutations found in FP-11g *M. smegmatis* resistant mutants could be  
368 definitively associated with the proposed mechanism of action of this compound, but all of them  
369 may play a role in drug resistance. Expression of *M. smegmatis* MspA porin in *M. tuberculosis*  
370 promotes not only cell growth but also antibiotic susceptibility [29]. To date, porin genes have  
371 not yet been identified in *M. tuberculosis*, even though some studies suggest the presence of  
372 these structures in these organisms [22]. The mutation in MspA porin is likely to be the first  
373 mechanism of resistance developed by *M. smegmatis*, and hence the common mutation was  
374 found. Changes in the porin may interrupt the drug transportation into the cell and support cell  
375 survival. Since this porin is present in fast growing mycobacteria, it would be of significance in  
376 the treatment of atypical pathogenic mycobacteria including *M. abscessus* studied here [30].

377 Characterization of integral membrane proteins has been always a challenge due to the  
378 difficulty for the expression, solubility and crystallization of these proteins. Most of the  
379 information has been obtained through computational approaches, which predict the structural  
380 conformation of a protein based on the primary sequence and classify the different types of  
381 transmembrane proteins [31, 32]. Transmembrane proteins could be associated with  
382 mechanisms of resistance to drugs that are not targeting them directly. Integral component of  
383 membrane are channels through the cellular membrane that transport amino acids, lipids,  
384 coenzymes, carbohydrates, nucleotides and other metabolites [33]. Mutations in integral  
385 membrane proteins detected here may affect drug transportation through the membrane.  
386 Variation in channels that transport molecules through the cell wall will affect the intake of

387 molecules including drugs and metabolites. These integral components of membrane could also  
388 be non-characterized efflux pumps that may be extruding the drug from the organism and  
389 support the drug resistance.

390 In this study we detected the MmpL11 mutation in two resistant mutants. Previous  
391 studies with *M. tuberculosis* strains harboring mutations in MmpL proteins showed that all of the  
392 mutant strains retained general drug susceptibility to diverse antibacterial agents. This suggests  
393 that MmpL proteins do not play a direct role in drug resistance [34]. Nonetheless, recent studies  
394 have shown that the extended RND permease superfamily in *M. tuberculosis* include both RND  
395 multidrug efflux transporters and members of the MmpL family [35]. In *M. abscessus*, MmpL  
396 has been associated with drug resistance through efflux pumps [36]. Additionally, mutations on  
397 MmpL11 proteins has been associated with impairment of biofilm formation in *M. smegmatis*.  
398 The absence of this gene has generated a reduced permeability to antimicrobial agents [37, 38],  
399 which is evidence that this mutation may play an important role in FP-11g resistance.

400 Remarkably, we did not detect mutations in the *topA* gene in the resistant mutant isolates.  
401 This might be due to FP-11g acting as an unconventional catalytic inhibitor. These types of  
402 inhibitors are described as compounds that bind to the DNA as well as to the topoisomerase  
403 enzyme to inhibit the topoisomerase activity [39]. Mutations that affect the essential activity of  
404 topoisomerase I could compromise cell growth to a significant extent and would less likely be  
405 selected for resistance than the mutations detected here that can limit compound transport into  
406 the cell. It is also possible that due to its interaction with DNA, FP-11g inhibits multiple DNA  
407 binding proteins in its mode of action, including DNA gyrase as observed here. Further studies  
408 are required to identify other analogs of FP-11g that can be more selective in targeting  
409 topoisomerase I activity in its antimycobacterial mechanism of action. This would require

410 enhancing the interaction of the inhibitor with the MtbTopI enzyme, and reducing the  
411 dependence of inhibition on DNA binding.

412

## 413 **Acknowledgments**

414 We thank Dr. DeEtta Mills and Christina Burns from the International Forensic Research  
415 Institute at FIU for support in WGS.

416

## 417 **Funding**

418 This research was supported by NIH grant R01 AI069313 (to YT). Experimental SPR  
419 sensorgrams were measured using Biacore T200 SPR instrument available in Biacore Molecular  
420 Interaction Shared Resource (BMISR) facility at Georgetown University. The BMISR is  
421 supported by NIH grant P30CA51008. REU participant RB was supported by the NSF-REU  
422 Site Grant CHE1560375 to FIU. The funders had no role in study design, data collection and  
423 analysis, decision to publish, or preparation of the manuscript.

424

## 425 **References**

- 426 1. World Health Organization, W.H.O., *Global tuberculosis report*. 2018.
- 427 2. Marais, B.J., *The global tuberculosis situation and the inexorable rise of drug-resistant*  
428 *disease*. *Adv Drug Deliv Rev*, 2016. **102**: p. 3-9.
- 429 3. Wang, J.C., *Cellular roles of DNA topoisomerases: a molecular perspective*. *Nat Rev*  
430 *Mol Cell Biol*, 2002. **3**(6): p. 430-40.
- 431 4. Corbett, K.D. and J.M. Berger, *Structure, molecular mechanisms, and evolutionary*  
432 *relationships in DNA topoisomerases*. *Annu Rev Biophys Biomol Struct*, 2004. **33**: p. 95-  
433 118.
- 434 5. Schoeffler, A.J. and J.M. Berger, *DNA topoisomerases: harnessing and constraining*  
435 *energy to govern chromosome topology*. *Q Rev Biophys*, 2008. **41**(1): p. 41-101.
- 436 6. Forterre, P. and D. Gadelle, *Phylogenomics of DNA topoisomerases: their origin and*  
437 *putative roles in the emergence of modern organisms*. *Nucleic Acids Res*, 2009. **37**(3): p.  
438 679-92.
- 439 7. Ahmed, W., et al., *Conditional silencing of topoisomerase I gene of Mycobacterium*  
440 *tuberculosis validates its essentiality for cell survival*. *FEMS microbiology letters*, 2014.  
441 **353**(2): p. 116-123.
- 442 8. Ahmed, W., et al., *Reduction in DNA topoisomerase I level affects growth, phenotype*  
443 *and nucleoid architecture of Mycobacterium smegmatis*. *Microbiology (Reading,*  
444 *England)*, 2015. **161**(Pt 2): p. 341-353.
- 445 9. Nagaraja, V., et al., *DNA topoisomerase I and DNA gyrase as targets for TB therapy*.  
446 *Drug Discov Today*, 2017. **22**(3): p. 510-518.

- 447 10. Ravishankar, S., et al., *Genetic and chemical validation identifies Mycobacterium*  
448 *tuberculosis topoisomerase I as an attractive anti-tubercular target*. Tuberculosis  
449 (Edinb), 2015. **95**(5): p. 589-98.
- 450 11. Yu, X., et al., *Synthesis, evaluation, and CoMFA study of fluoroquinophenoxazine*  
451 *derivatives as bacterial topoisomerase IA inhibitors*. Eur J Med Chem, 2017. **125**: p. 515-  
452 527.
- 453 12. Fujimoto-Nakamura, M., et al., *Accumulation of mutations in both gyrB and parE genes*  
454 *is associated with high-level resistance to novobiocin in Staphylococcus aureus*.  
455 Antimicrob Agents Chemother, 2005. **49**(9): p. 3810-5.
- 456 13. Annamalai, T., et al., *Analysis of DNA relaxation and cleavage activities of recombinant*  
457 *Mycobacterium tuberculosis DNA topoisomerase I from a new expression and*  
458 *purification protocol*. BMC Biochem, 2009. **10**: p. 18.
- 459 14. Cao, Y., et al., *Investigating mycobacterial topoisomerase I mechanism from the analysis*  
460 *of metal and DNA substrate interactions at the active site*. Nucleic Acids Res. 2018.  
461 **46**:7296-7308.
- 462 15. Ren, J. and J.B. Chaires, *Sequence and structural selectivity of nucleic acid binding*  
463 *ligands*. Biochemistry, 1999. **38**(49): p. 16067-75.
- 464 16. Gu, M., et al., *Fluorescently labeled circular DNA molecules for DNA topology and*  
465 *topoisomerases*. Sci Rep, 2016. **6**: p. 36006.
- 466 17. Stephan, J., et al., *The growth rate of Mycobacterium smegmatis depends on sufficient*  
467 *porin-mediated influx of nutrients*. Mol Microbiol, 2005. **58**(3): p. 714-30.
- 468 18. Stahl, C., et al., *MspA provides the main hydrophilic pathway through the cell wall of*  
469 *Mycobacterium smegmatis*. Mol Microbiol, 2001. **40**(2): p. 451-64.

- 470 19. Stephan, J., et al., *Multidrug resistance of a porin deletion mutant of Mycobacterium*  
471 *smegmatis*. Antimicrob Agents Chemother, 2004. **48**(11): p. 4163-70.
- 472 20. Danilchanka, O., M. Pavlenok, and M. Niederweis, *Role of porins for uptake of*  
473 *antibiotics by Mycobacterium smegmatis*. Antimicrob Agents Chemother, 2008. **52**(9): p.  
474 3127-34.
- 475 21. Niederweis, M., et al., *Cloning of the mspA gene encoding a porin from Mycobacterium*  
476 *smegmatis*. Mol Microbiol, 1999. **33**(5): p. 933-45.
- 477 22. Kartmann, B., S. Stenger, and M. Niederweis, *Porins in the cell wall of Mycobacterium*  
478 *tuberculosis*. J Bacteriol, 1999. **181**(20): p. 6543-6.
- 479 23. Adams, R., et al., *Binding sites in membrane proteins--diversity, druggability and*  
480 *prospects*. Eur J Cell Biol, 2012. **91**(4): p. 326-39.
- 481 24. Overington, J.P., B. Al-Lazikani, and A.L. Hopkins, *How many drug targets are there?*  
482 *Nat Rev Drug Discov*, 2006. **5**(12): p. 993-6.
- 483 25. Delmar, J.A., et al., *Structural Basis for the Regulation of the MmpL Transporters of*  
484 *Mycobacterium tuberculosis*. J Biol Chem, 2015. **290**(47): p. 28559-74.
- 485 26. Nessar, R., et al., *Mycobacterium abscessus: a new antibiotic nightmare*. J Antimicrob  
486 Chemother, 2012. **67**(4): p. 810-8.
- 487 27. Ishiekwene, C., et al., *Case report on pulmonary disease due to coinfection of*  
488 *Mycobacterium tuberculosis and Mycobacterium abscessus: Difficulty in diagnosis*.  
489 *Respir Med Case Rep*, 2017. **20**: p. 123-124.
- 490 28. Sohn, S., et al., *Mixed Infection of Mycobacterium abscessus subsp. abscessus and*  
491 *Mycobacterium tuberculosis in the Lung*. Korean J Thorac Cardiovasc Surg, 2017. **50**(1):  
492 p. 50-53.

- 493 29. Mailaender, C., et al., *The MspA porin promotes growth and increases antibiotic*  
494 *susceptibility of both Mycobacterium bovis BCG and Mycobacterium tuberculosis.*  
495 *Microbiology*, 2004. **150**(Pt 4): p. 853-64.
- 496 30. Cavalli, Z., et al., *High incidence of non-tuberculous mycobacteria-positive cultures*  
497 *among adolescent with cystic fibrosis.* *J Cyst Fibros*, 2017. **16**(5): p. 579-584.
- 498 31. Korepanova, A., et al., *Cloning and expression of multiple integral membrane proteins*  
499 *from Mycobacterium tuberculosis in Escherichia coli.* *Protein Sci*, 2005. **14**(1): p. 148-  
500 58.
- 501 32. Ding, C., et al., *Identification of mycobacterial membrane proteins and their types using*  
502 *over-represented tripeptide compositions.* *J Proteomics*, 2012. **77**: p. 321-8.
- 503 33. He, Z. and J. De Buck, *Cell wall proteome analysis of Mycobacterium smegmatis strain*  
504 *MC2 155.* *BMC Microbiol*, 2010. **10**: p. 121.
- 505 34. Domenech, P., M.B. Reed, and C.E. Barry, 3rd, *Contribution of the Mycobacterium*  
506 *tuberculosis MmpL protein family to virulence and drug resistance.* *Infect Immun*, 2005.  
507 **73**(6): p. 3492-501.
- 508 35. Sandhu, P. and Y. Akhter, *The internal gene duplication and interrupted coding*  
509 *sequences in the MmpL genes of Mycobacterium tuberculosis: Towards understanding*  
510 *the multidrug transport in an evolutionary perspective.* *Int J Med Microbiol*, 2015.  
511 **305**(3): p. 413-23.
- 512 36. Strnad, L. and K.L. Winthrop, *Treatment of Mycobacterium abscessus Complex.* *Semin*  
513 *Respir Crit Care Med*, 2018. **39**(3): p. 362-376.

- 514 37. Pacheco, S.A., et al., *MmpL11 protein transports mycolic acid-containing lipids to the*  
515 *mycobacterial cell wall and contributes to biofilm formation in Mycobacterium*  
516 *smegmatis*. J Biol Chem, 2013. **288**(33): p. 24213-22.
- 517 38. Purdy, G.E., M. Niederweis, and D.G. Russell, *Decreased outer membrane permeability*  
518 *protects mycobacteria from killing by ubiquitin-derived peptides*. Mol Microbiol, 2009.  
519 **73**(5): p. 844-57.
- 520 39. Akerman, K.J., et al., *Gold(III) macrocycles: nucleotide-specific unconventional catalytic*  
521 *inhibitors of human topoisomerase I*. J Am Chem Soc, 2014. **136**(15): p. 5670-82.
- 522
- 523



524 **Table 1.** FP-11g resistant mutants, resistance levels and cross-resistance to Moxifloxacin

525

526

527

528

529

530

531

532

533

| <i>M. smegmatis</i><br>Strain | FP-11g<br>concentration for<br>mutant isolation<br>X MIC (0.31 $\mu$ M) | FP-11g<br>MIC ( $\mu$ M) | Fold-<br>increase in<br>FP-11g MIC | Moxifloxacin<br>MIC ( $\mu$ g/ml) | Fold-<br>increase in<br>Moxifloxacin<br>MIC |
|-------------------------------|-------------------------------------------------------------------------|--------------------------|------------------------------------|-----------------------------------|---------------------------------------------|
| WT                            | N/A                                                                     | 0.31                     | N/A                                | 0.08-0.16                         | N/A                                         |
| PGM1                          | 8X $\rightarrow$ 16X                                                    | 2.5                      | 8X                                 | 0.16                              | 2X                                          |
| PGM2                          | 8X $\rightarrow$ 16X                                                    | 5                        | 16X                                | 0.32                              | 4X                                          |
| PGM3                          | 4X $\rightarrow$ 10X                                                    | 5                        | 16X                                | 0.32                              | 4X                                          |
| PGM4                          | 4X $\rightarrow$ 13X                                                    | 10                       | 32X                                | 0.32                              | 4X                                          |
| PGM5                          | 4X $\rightarrow$ 16X                                                    | 5                        | 16X                                | 0.32                              | 4X                                          |
| PGM6                          | 4X $\rightarrow$ 16X                                                    | 5                        | 16X                                | 0.16                              | 2X                                          |

534 **Table 2.** Mutations identified in each FP-11g resistant mutant

| Strain ID | Region          | Gene       | Type | Nucleotide |        | Amino acid |        | Functional annotation in <i>M. smegmatis</i>                              |
|-----------|-----------------|------------|------|------------|--------|------------|--------|---------------------------------------------------------------------------|
|           |                 |            |      | Ref        | Allele | Ref        | Allele |                                                                           |
| PGM1      | 270553^270554   | MSMEG_0241 | INS  | -          | C      | L          | fs     | MmpL11 protein. Function unknown                                          |
|           | 1039173         | MSMEG_0965 | SNV  | T          | C      | L          | P      | Porin MspA                                                                |
|           | 6498888^6498889 | MSMEG_6430 | INS  | -          | C      | S          | fs     | Hypothetical protein. Function unknown. Integral component of membrane    |
| PGM2      | 270553^270554   | MSMEG_0241 | INS  | -          | C      | L          | fs     | MmpL11 protein. Function unknown                                          |
|           | 1039173         | MSMEG_0965 | SNV  | T          | C      | L          | P      | Porin MspA                                                                |
|           | 4715711^4715712 | MSMEG_4629 | INS  | -          | T      |            |        | pseudogene                                                                |
|           | 6498888^6498889 | MSMEG_6430 | INS  | -          | C      | S          | fs     | Hypothetical protein. Function unknown. Integral component of membrane    |
|           | 6498891^6498892 | MSMEG_6430 | INS  | -          | C      | D          | fs     | Hypothetical protein. Function unknown. Integral component of membrane    |
|           | 6498895         | MSMEG_6430 | SNV  | G          | C      | S          | C      | Hypothetical protein. Function unknown. Integral component of membrane    |
|           | 6498901         | MSMEG_6430 | SNV  | G          | T      | T          | K      | Hypothetical protein. Function unknown. Integral component of membrane    |
| PGM3      | 1013796         | MSMEG_0933 | DEL  | C          | -      | R          | fs     | Conserved hypothetical protein. Function unknown                          |
|           | 1039098         | MSMEG_0965 | SNV  | C          | T      | T          | I      | Porin MspA                                                                |
|           | 2883459         | MSMEG_2820 | SNV  | T          | G      | I          | S      | Hypothetical protein. Function unknown. Integral component of membrane    |
|           | 5707525         | MSMEG_5623 | SNV  | C          | A      | D          | Y      | L-carnitine dehydratase. Function unknown                                 |
| PGM4      | 1039098         | MSMEG_0965 | SNV  | C          | T      | T          | I      | Porin MspA                                                                |
|           | 1604708         | MSMEG_1513 | SNV  | G          | C      | S          | C      | Conserved hypothetical protein. Function unknown. oxidoreductase activity |
| PGM5      | 269640^269641   | MSMEG_0240 | INS  | -          | A      | M          | fs     | Conserved hypothetical protein. Function unknown                          |
|           | 1039098         | MSMEG_0965 | SNV  | C          | T      | T          | I      | Porin MspA                                                                |
|           | 1604708         | MSMEG_1513 | SNV  | G          | C      | S          | C      | Conserved hypothetical protein. Function unknown. oxidoreductase activity |
|           | 5707525         | MSMEG_5623 | SNV  | C          | A      | D          | Y      | L-carnitine dehydratase. Function unknown                                 |
| PGM6      | 1039098         | MSMEG_0965 | SNV  | C          | T      | T          | I      | Porin MspA                                                                |
|           | 3612348         | MSMEG_3552 | SNV  | C          | G      | E          | Q      | Conserved hypothetical protein. Function unknown                          |
|           | 5707525         | MSMEG_5623 | SNV  | C          | A      | D          | Y      | L-carnitine dehydratase. Function unknown                                 |

|                 |            |     |   |   |   |    |                                                                           |
|-----------------|------------|-----|---|---|---|----|---------------------------------------------------------------------------|
| 6498888^6498889 | MSMEG_6430 | INS | - | C | S | fs | Hypothetical protein.<br>Function unknown. Integral component of membrane |
| 6498891^6498892 | MSMEG_6430 | INS | - | C | D | fs | Hypothetical protein.<br>Function unknown. Integral component of membrane |
| 6498895         | MSMEG_6430 | SNV | G | C | S | C  | Hypothetical protein.<br>Function unknown. Integral component of membrane |
| 6498898^6498899 | MSMEG_6430 | INS | - | T | P | fs | Hypothetical protein.<br>Function unknown. Integral component of membrane |
| 6498901         | MSMEG_6430 | SNV | G | T | T | K  | Hypothetical protein.<br>Function unknown. Integral component of membrane |

535 Ref: reference; SNV: single nucleotide variation; INS: insertion; DEL: deletion; fs: frame shift

536

537 **Table 3.** Optical properties of FP-11g in the presence and absence of ST DNA in 1×BPE buffer  
538

|        | $\lambda_{\max}$ | $\epsilon_{334}$ | $\epsilon_{386}$ | $\epsilon_{406}$ | $\Delta T_m^a$ | Relative                  |
|--------|------------------|------------------|------------------|------------------|----------------|---------------------------|
| FP-11g | (nm)             | $M^{-1}cm^{-1}$  | $M^{-1}cm^{-1}$  | $M^{-1}cm^{-1}$  | (°C)           | fluorescence <sup>b</sup> |
| Free   | 386              | 4,646            | 6,033            | 5,587            | N/A            | 1.0                       |
| Bound  | 406              | 12,321           | 5,284            | 4,418            | 11.1           | 1.5                       |
|        | 334              |                  |                  |                  |                |                           |

539 <sup>a</sup> $\Delta T_m = T_m - T_m^0$  where  $T_m$  and  $T_m^0$  represent the DNA UV melting temperature in the presence  
540 and absence of 40  $\mu M$  of FP-11g (Fig. 4C).

541 <sup>b</sup>At  $\lambda_{em} = 550$  nm with  $\lambda_{ex} = 386$  nm. The fluorescence intensity is relative to that of free FP-11g.

542

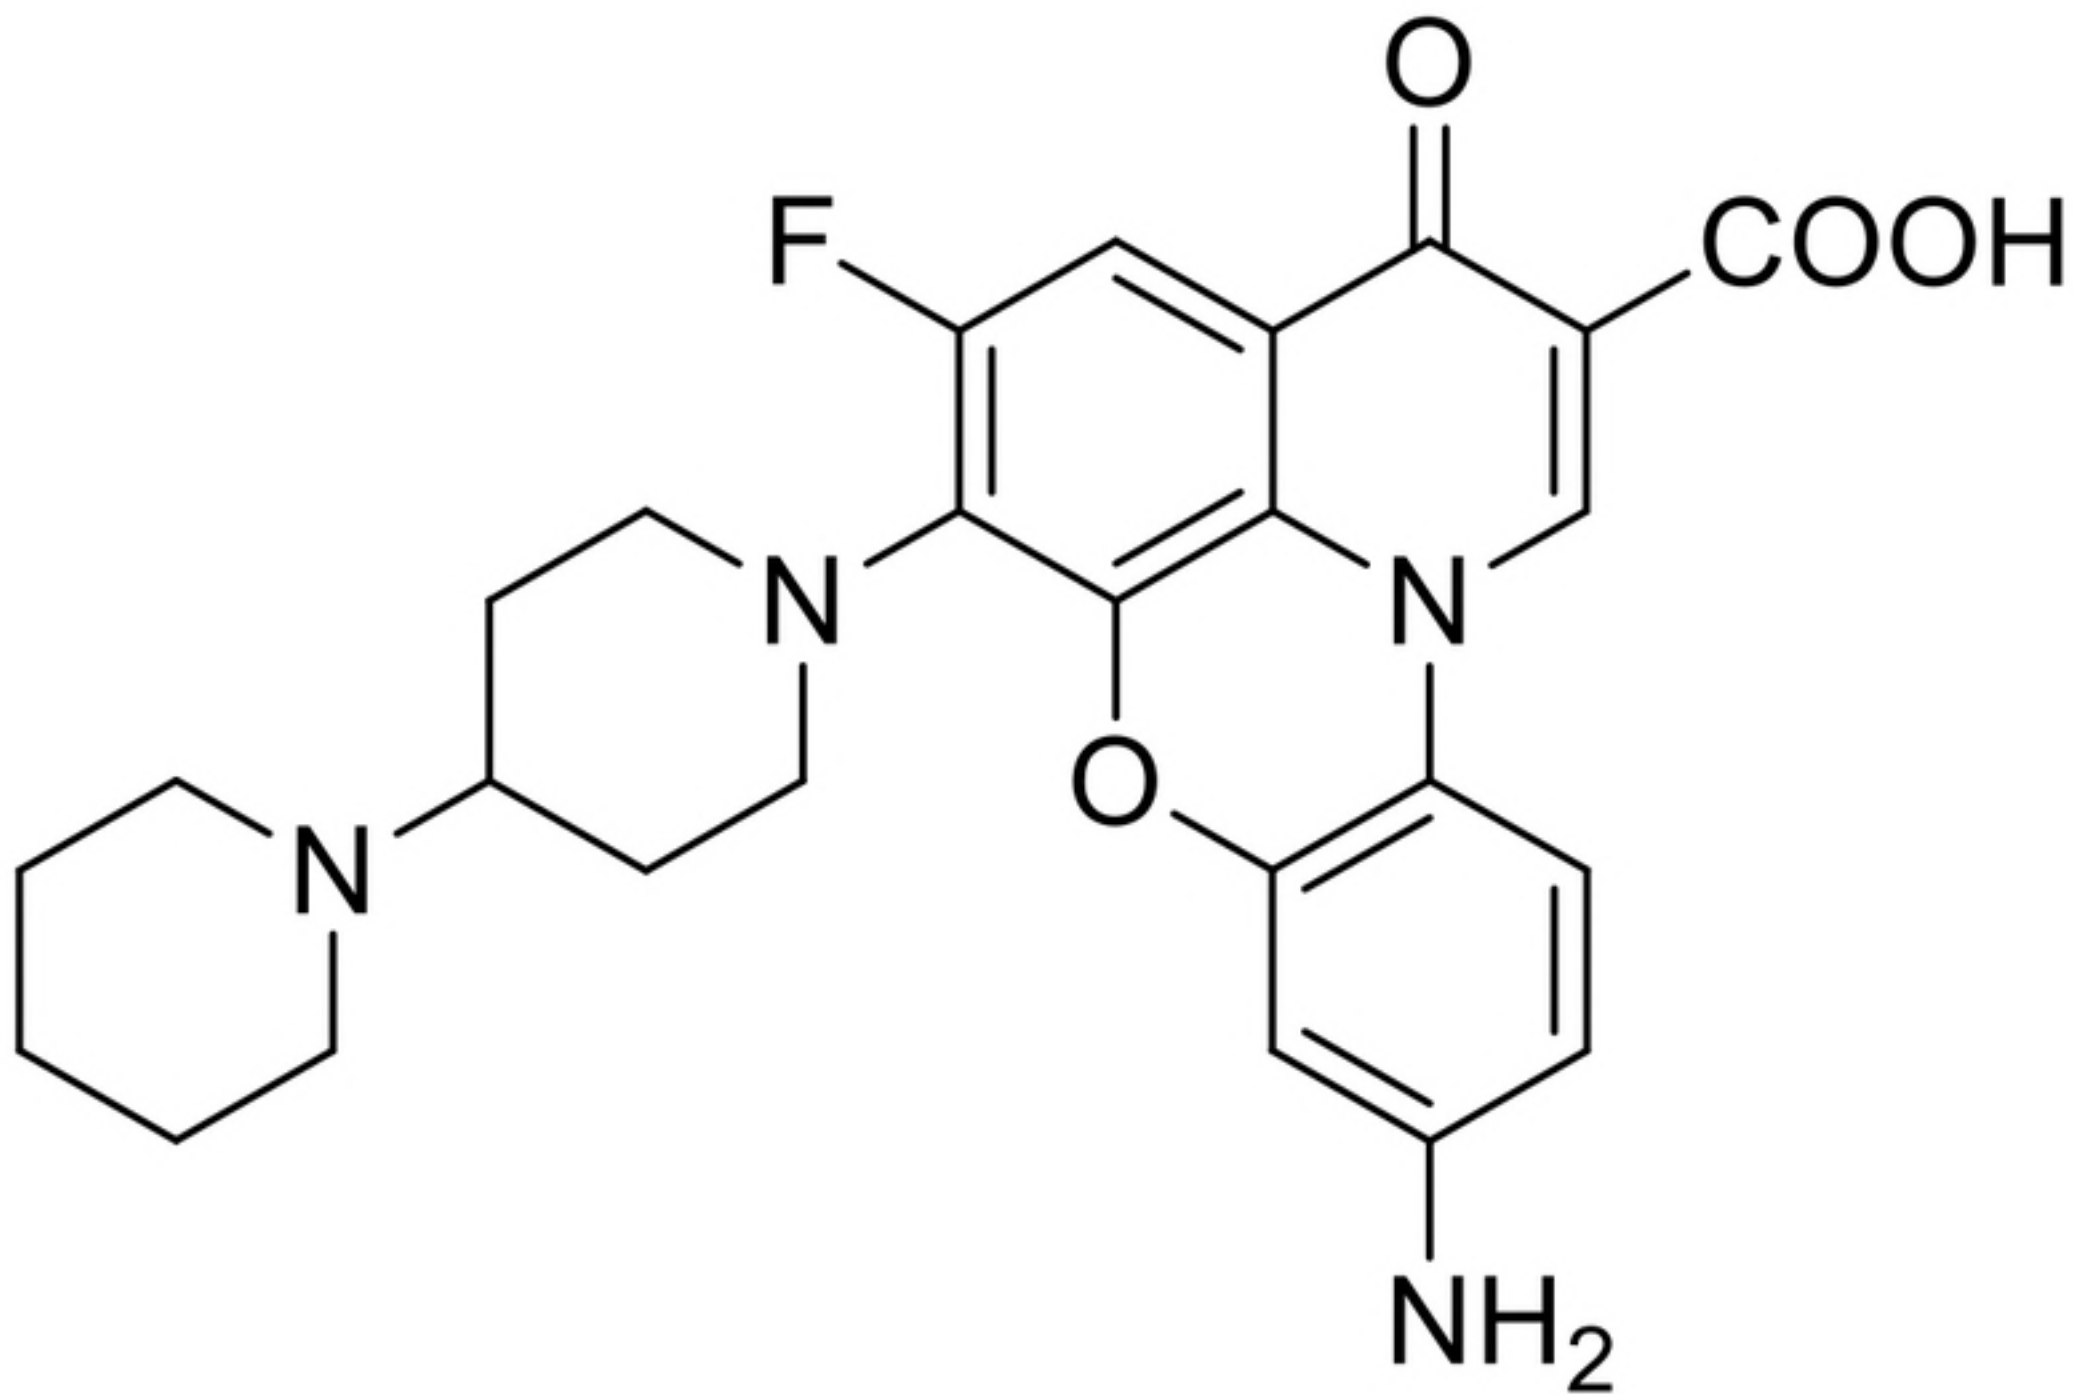

# Scheme 1. Structure of FP-11g

**A**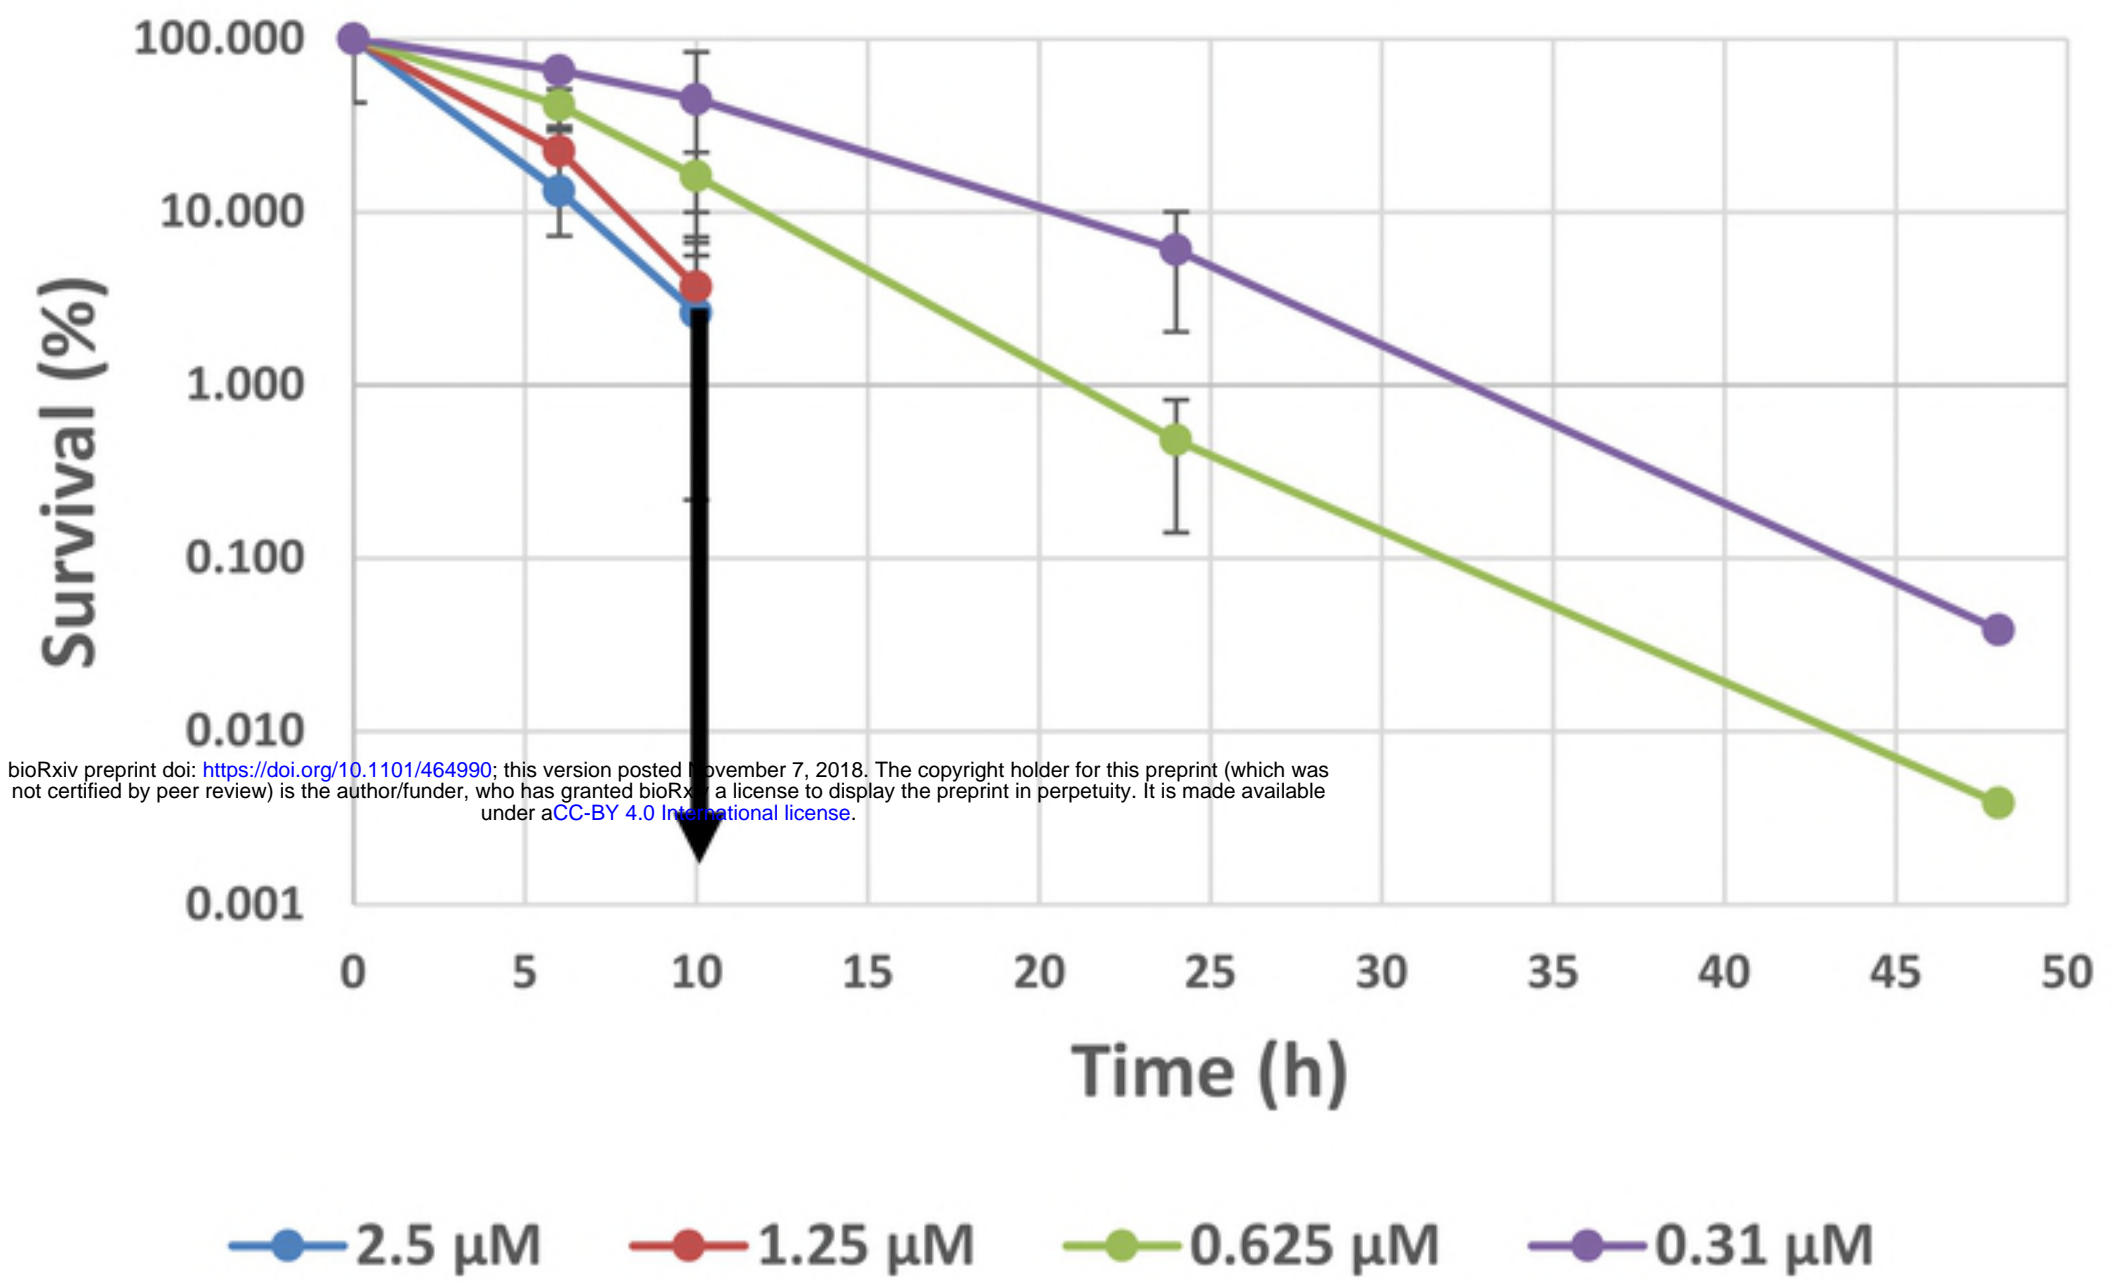**B**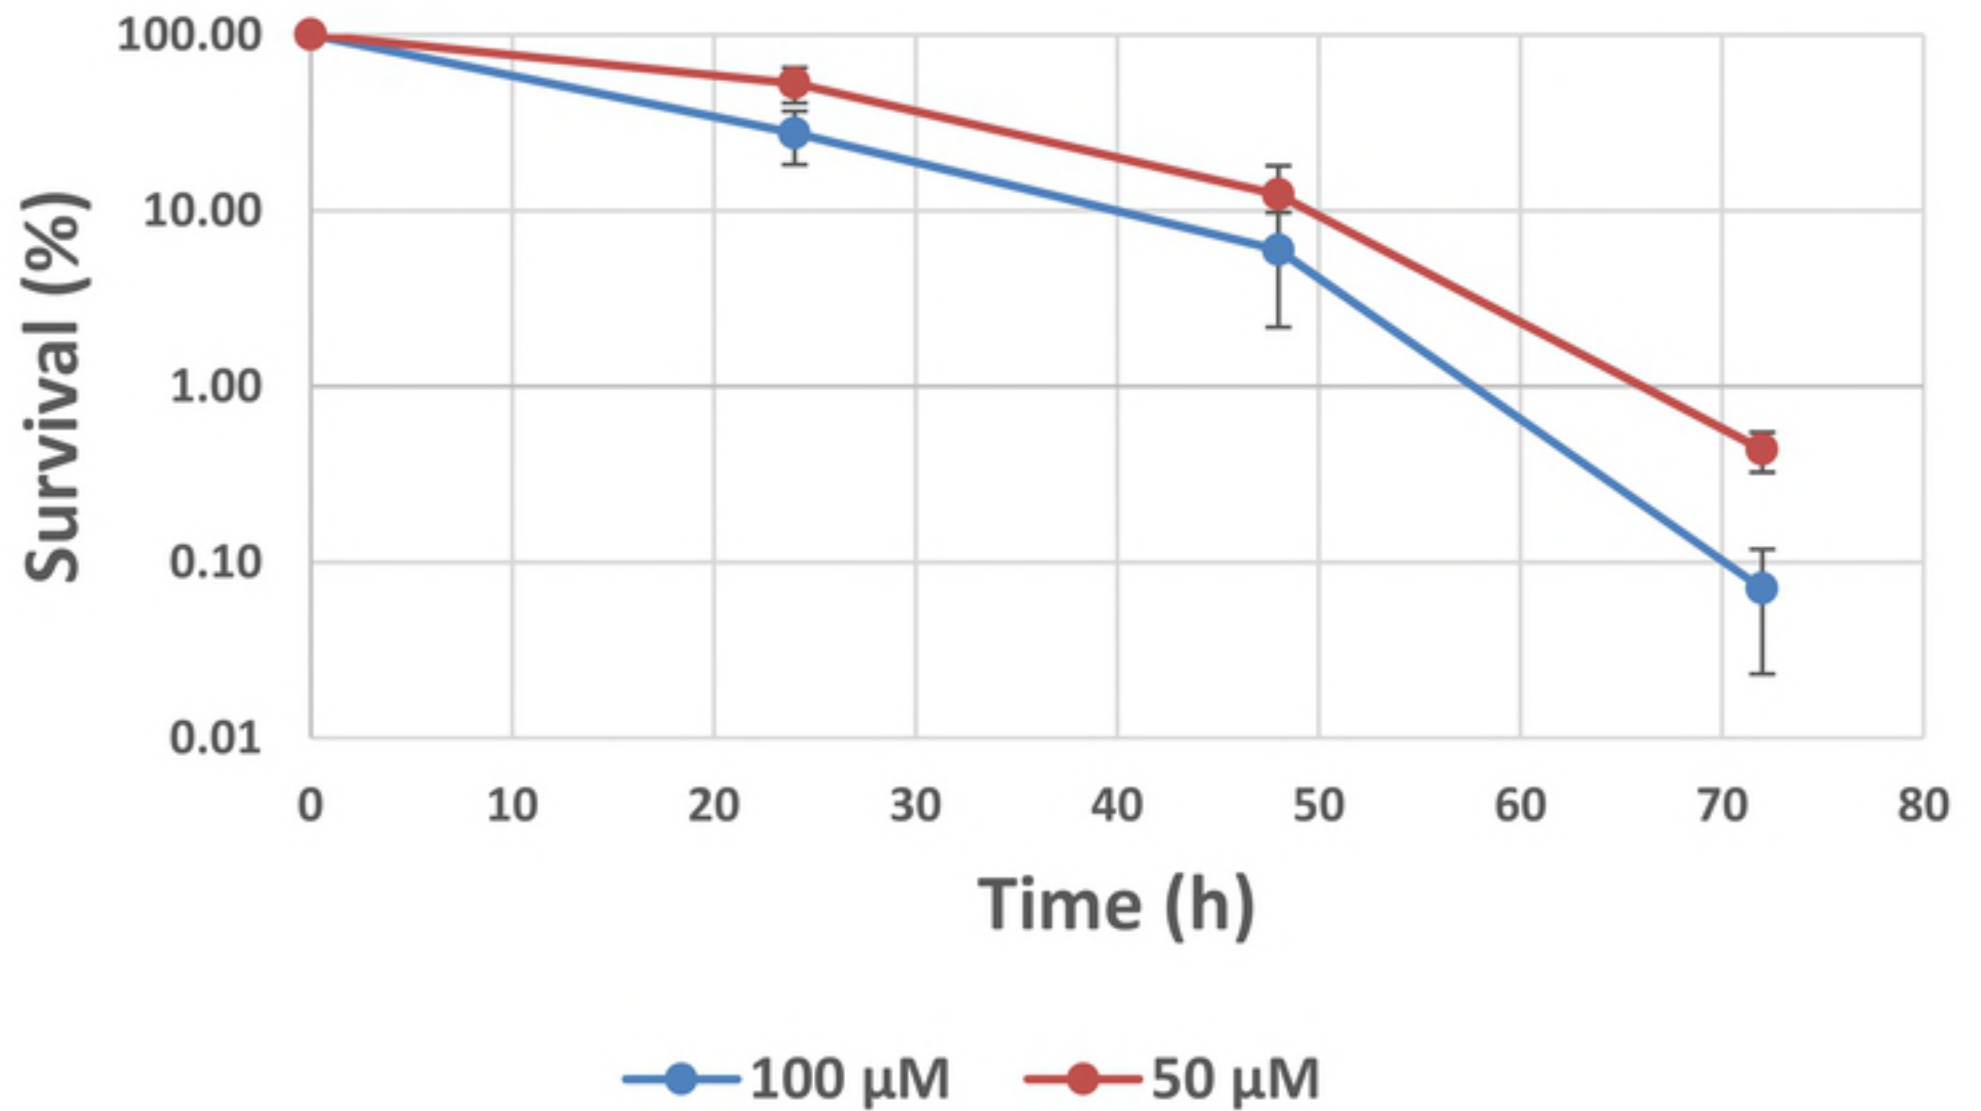

Fig 1

**A**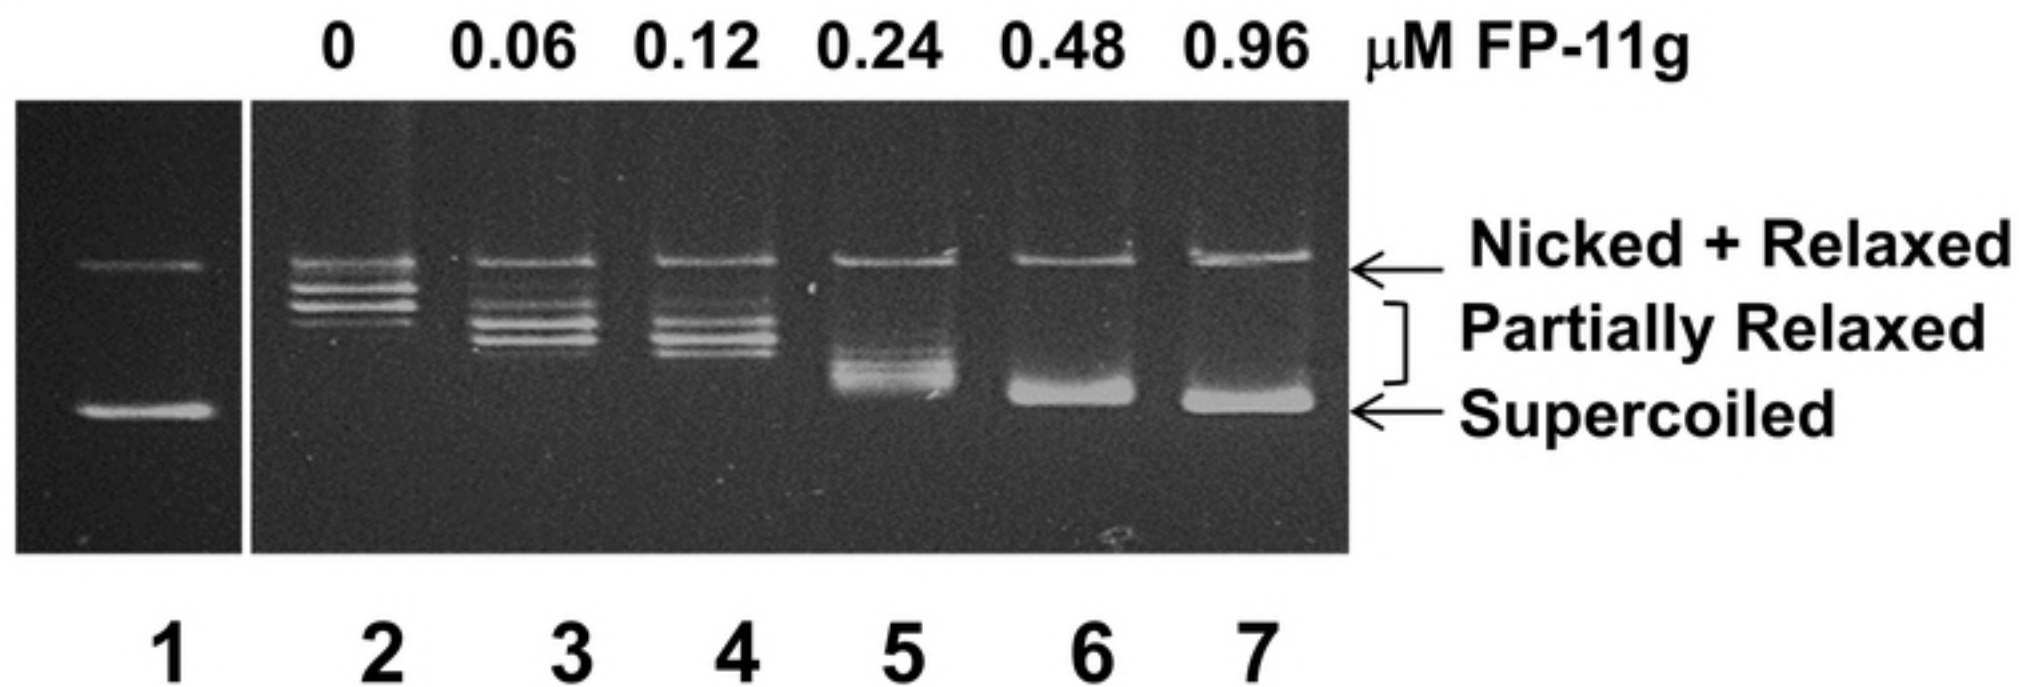**B**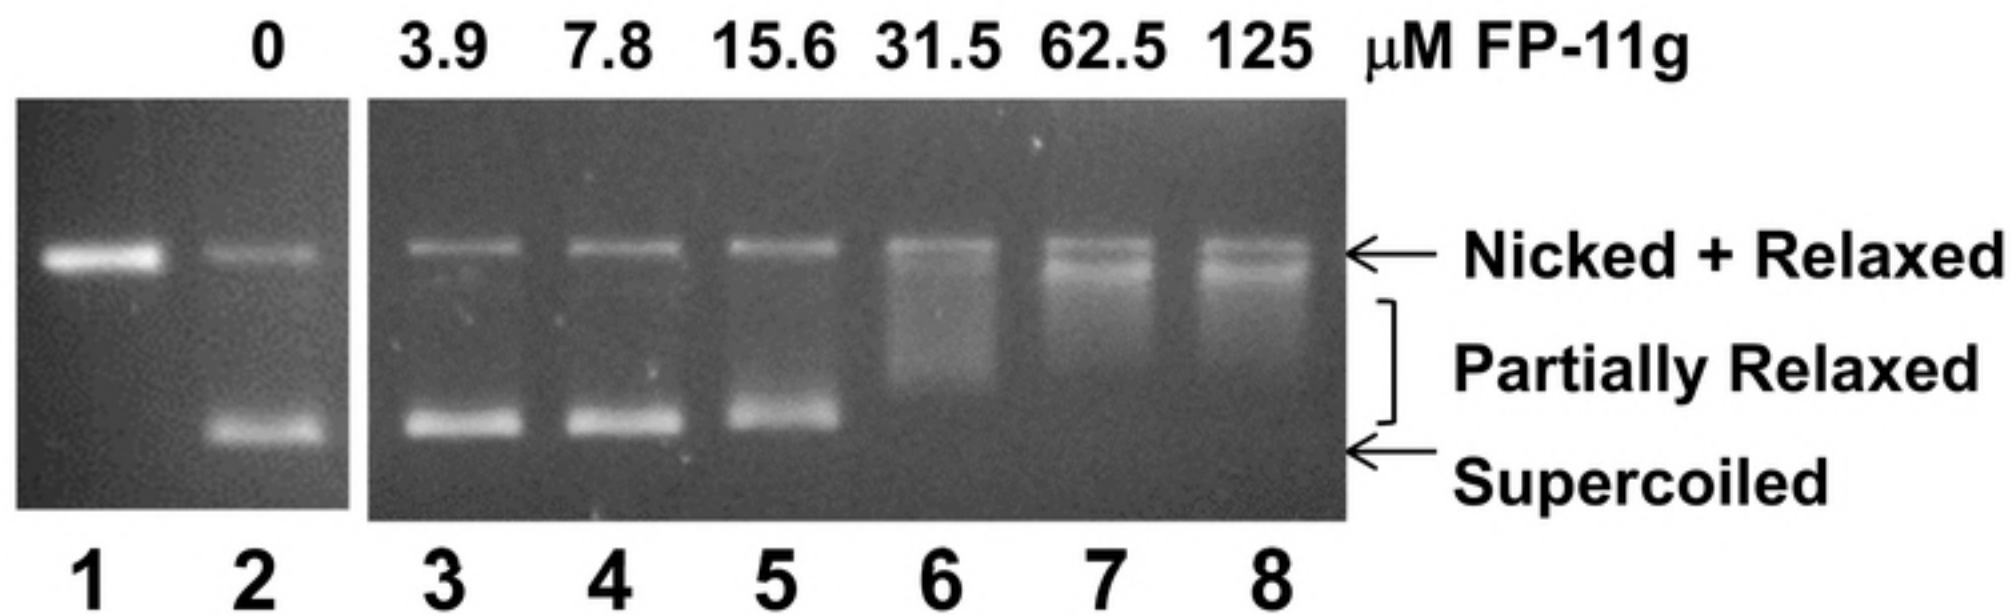

Fig 2

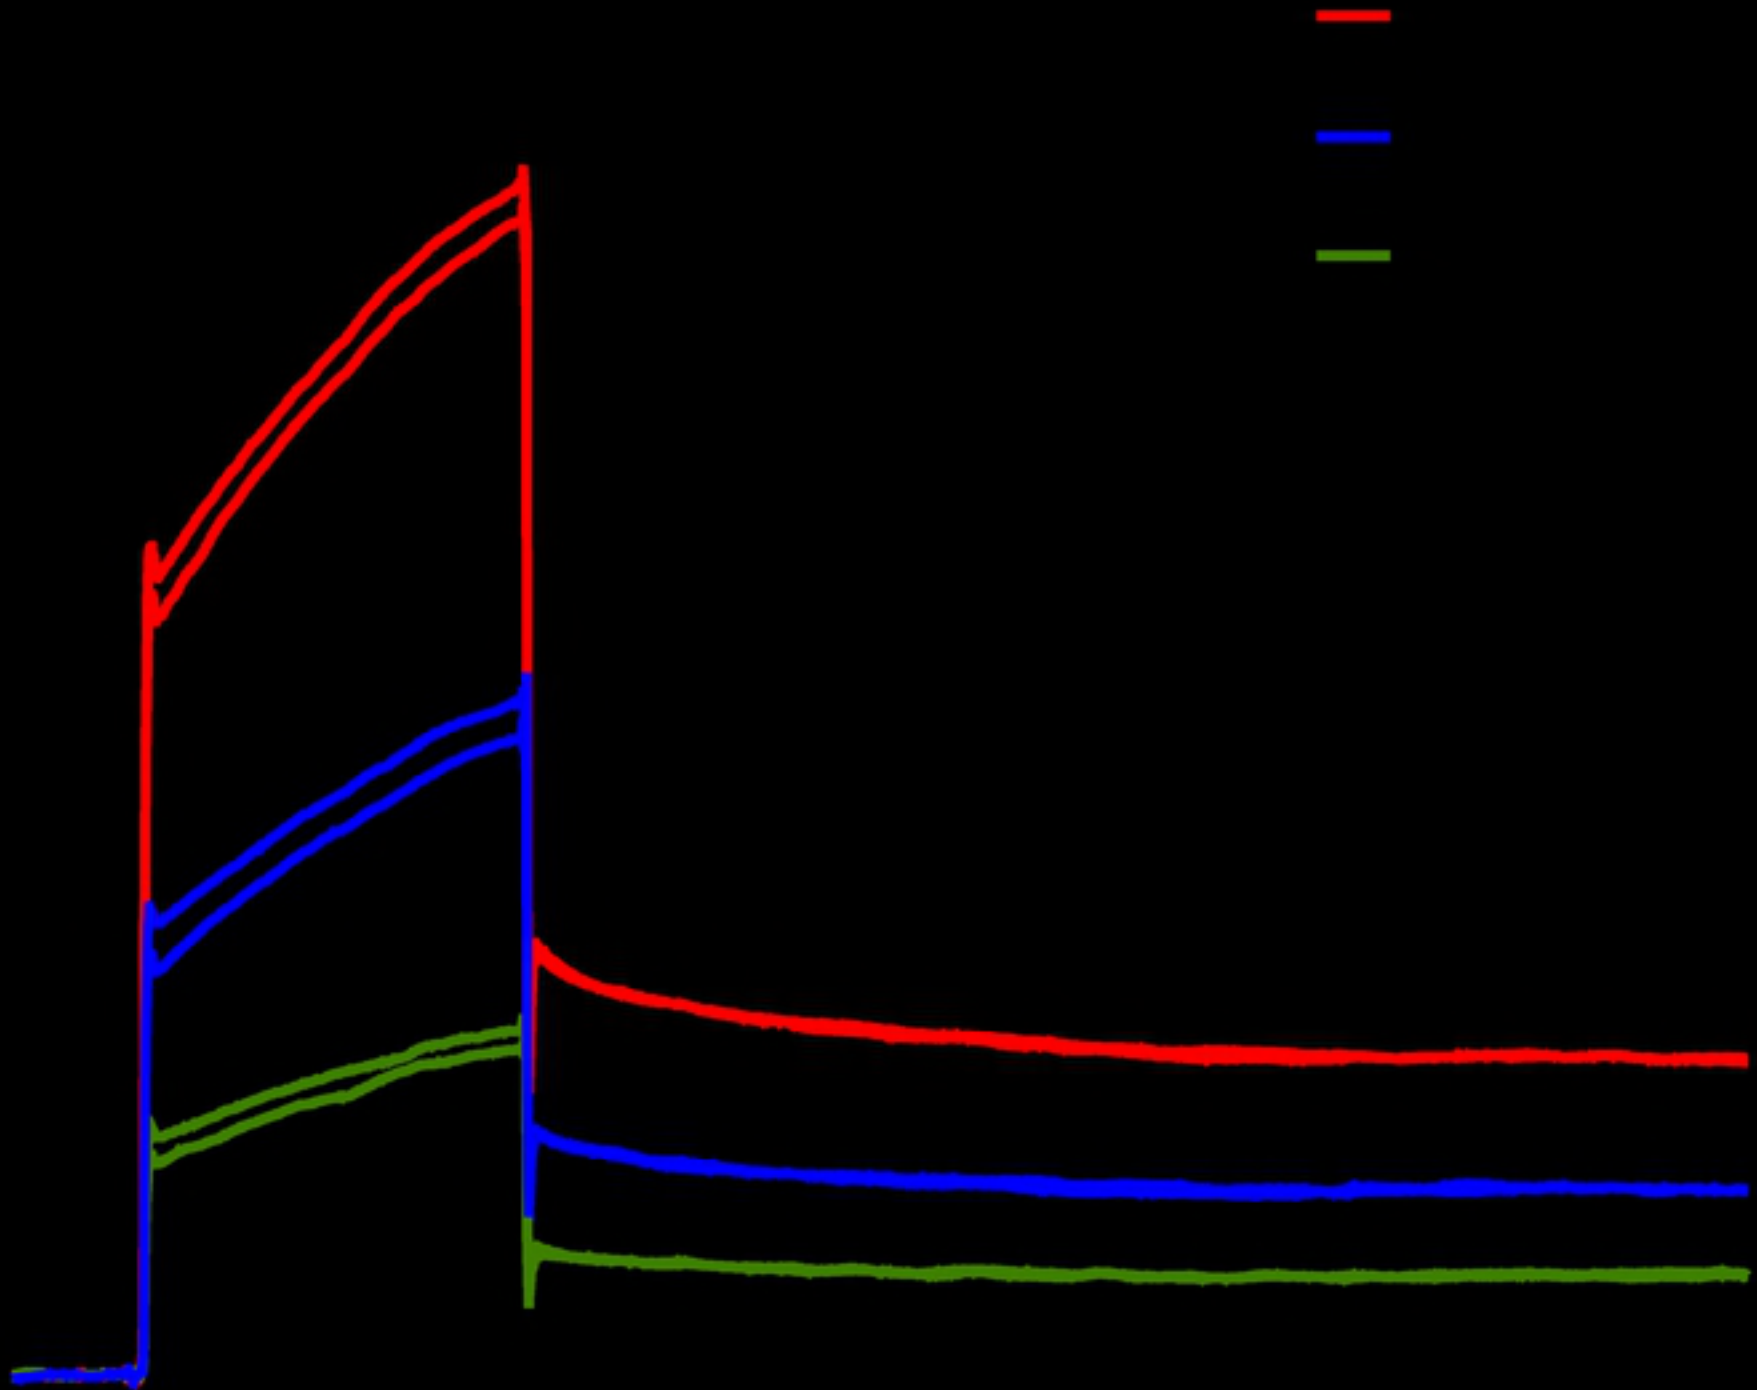

Fig 3



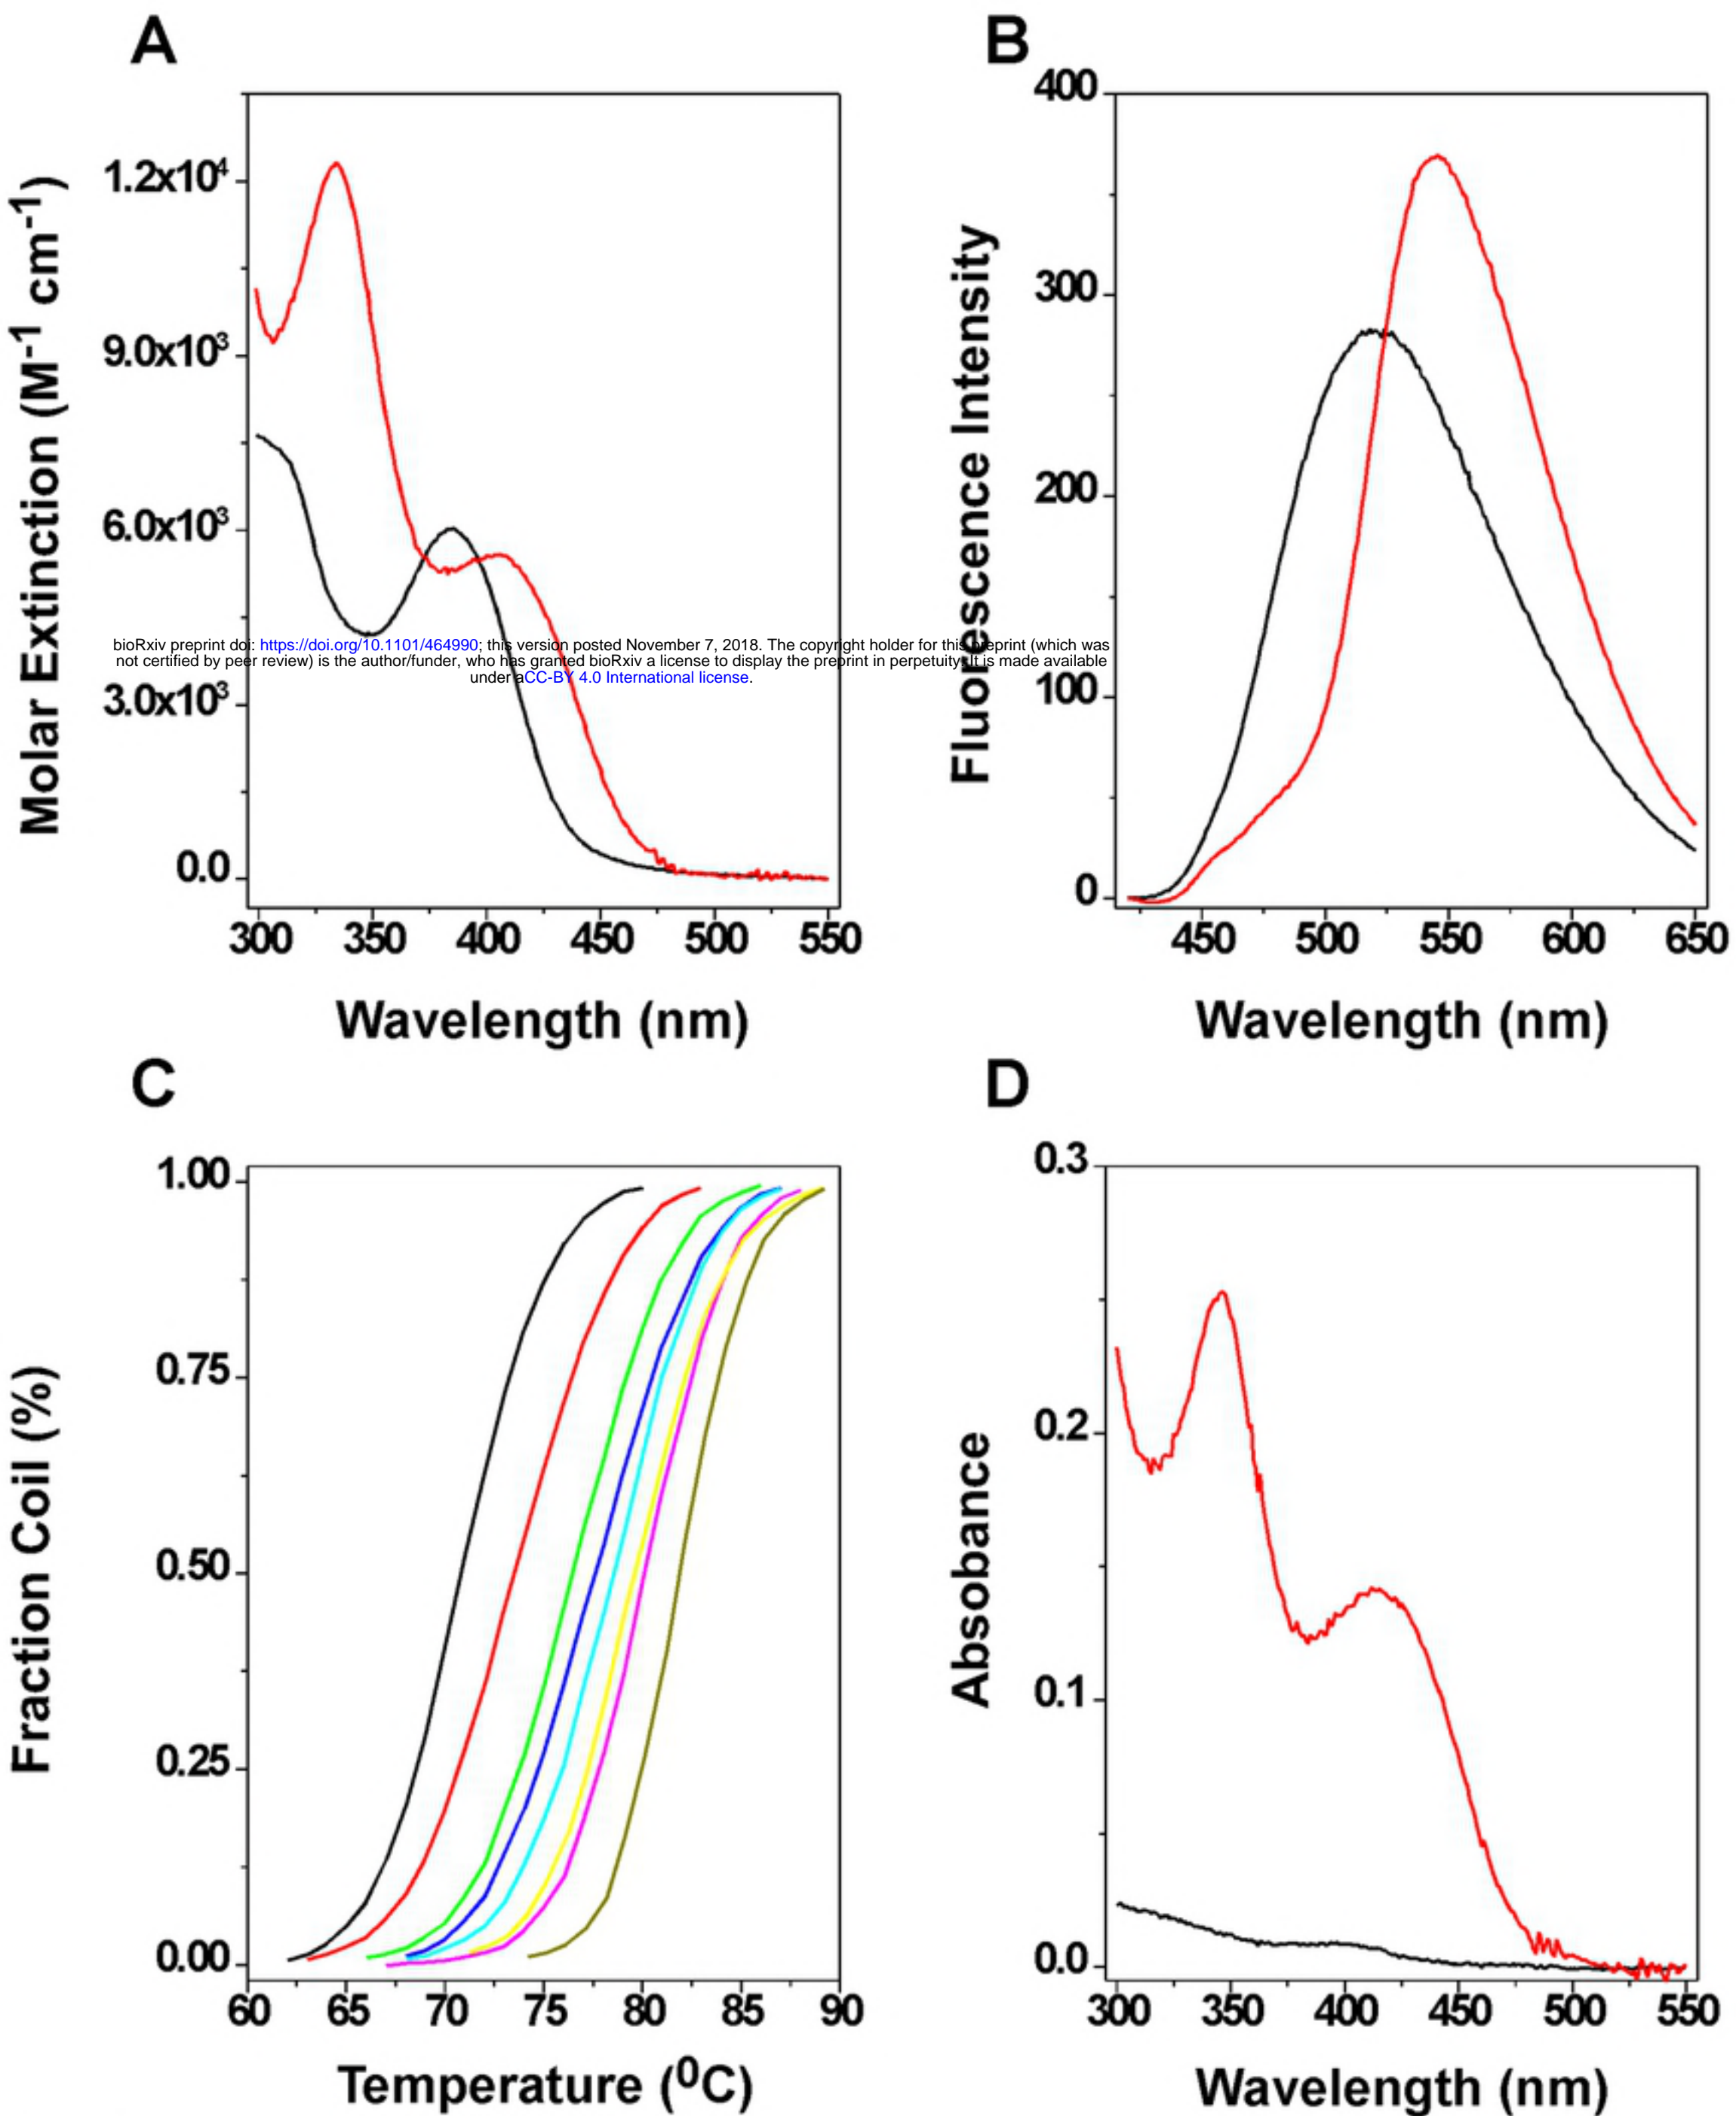

Fig 4

0 .5 1 2 5 10  $\mu$ M FP-11g

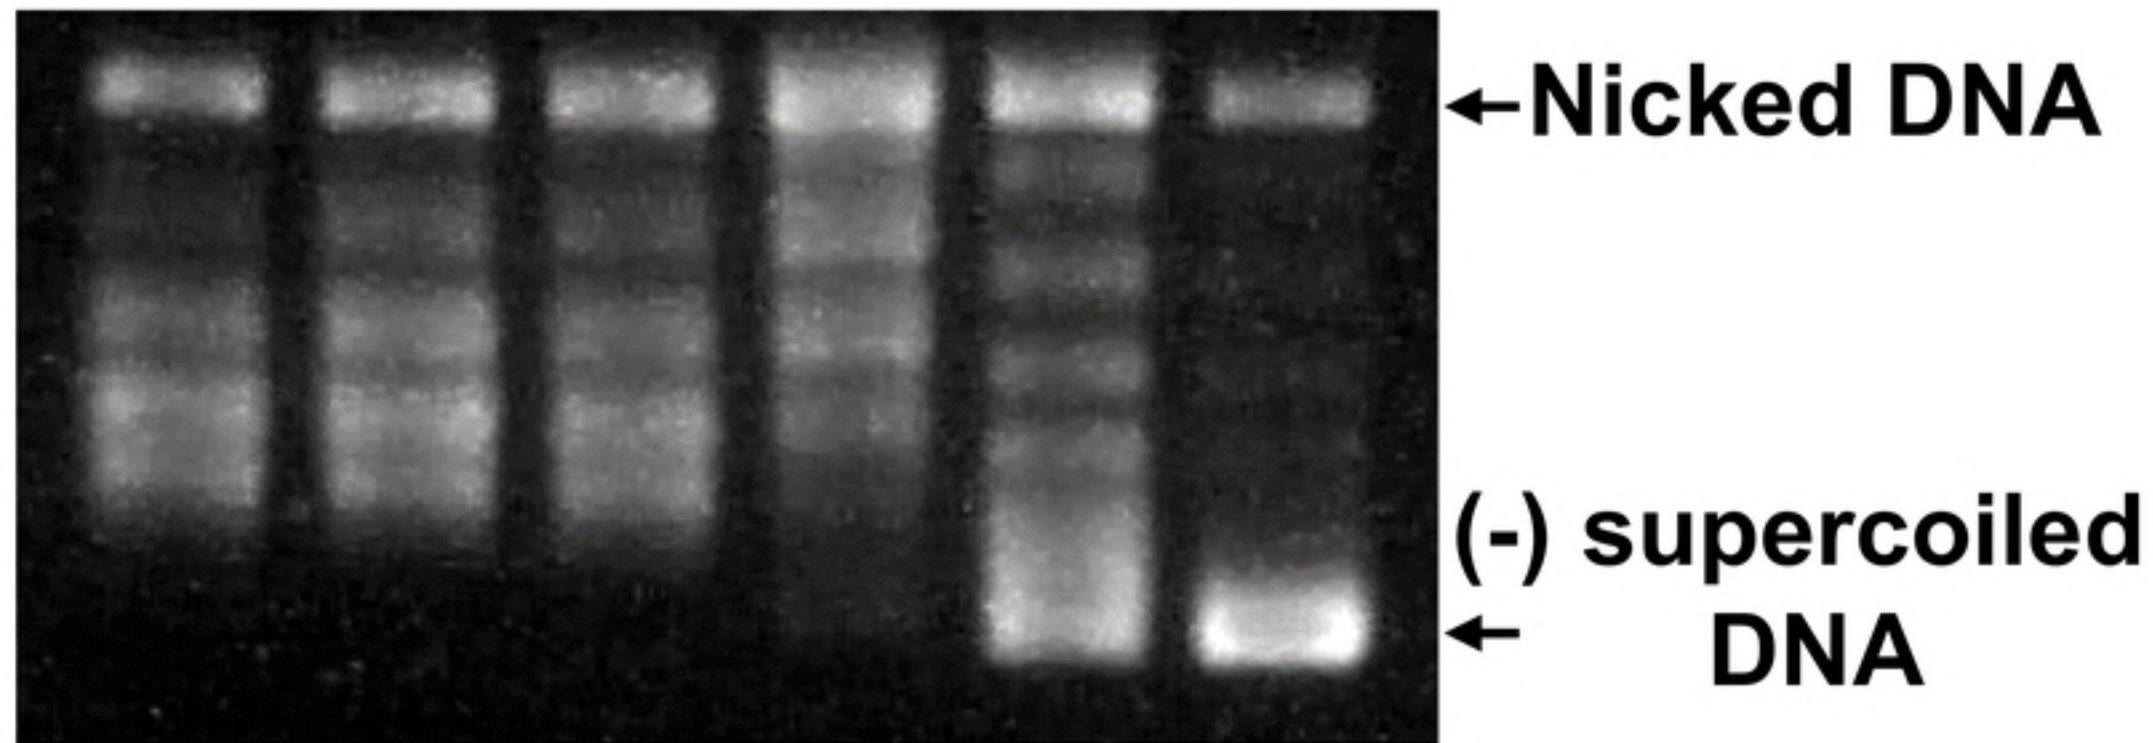

Fig 5
